# Supplementary material for: Developing architecture of system management in the English NHS: evidence from a qualitative study of three Integrated Care Systems
Source: PubMed Central journal article supplement (PMC9923249; doi:10.1136/bmjopen-2022-065993), 2023-02-08
Supplement: bmjopen-2022-065993.draft_revisions.pdf [file bmjopen-2022-065993.draft_revisions.pdf]

# BMJ Open

BMJ Open is committed to open peer review. As part of this commitment we make the peer review history of every article we publish publicly available.

When an article is published we post the peer reviewers' comments and the authors' responses online. We also post the versions of the paper that were used during peer review. These are the versions that the peer review comments apply to.

The versions of the paper that follow are the versions that were submitted during the peer review process. They are not the versions of record or the final published versions. They should not be cited or distributed as the published version of this manuscript.

BMJ Open is an open access journal and the full, final, typeset and author-corrected version of record of the manuscript is available on our site with no access controls, subscription charges or pay-per-view fees (<http://bmjopen.bmj.com>).

If you have any questions on BMJ Open's open peer review process please email [info.bmjopen@bmj.com](mailto:info.bmjopen@bmj.com)

# BMJ Open

## The developing architecture of system management in the English NHS: evidence from a qualitative study of three Integrated Care Systems

|                               |                                                                                                                                                                                                                                                                                                                                                                                                  |
|-------------------------------|--------------------------------------------------------------------------------------------------------------------------------------------------------------------------------------------------------------------------------------------------------------------------------------------------------------------------------------------------------------------------------------------------|
| Journal:                      | <i>BMJ Open</i>                                                                                                                                                                                                                                                                                                                                                                                  |
| Manuscript ID                 | bmjopen-2022-065993                                                                                                                                                                                                                                                                                                                                                                              |
| Article Type:                 | Original research                                                                                                                                                                                                                                                                                                                                                                                |
| Date Submitted by the Author: | 24-Jun-2022                                                                                                                                                                                                                                                                                                                                                                                      |
| Complete List of Authors:     | Sanderson, Marie; London School of Hygiene & Tropical Medicine, Allen, Pauline; Health Services Research Unit<br>Osipovic, Dorota; London School of Hygiene and Tropical Medicine, London WC1H 9SH, Health Services Research and Policy<br>Petsoulas, Christina; LSHTM, Health Services Research Unit<br>Boiko, O.; LSHTM, Health Services Research and Policy<br>Lorne, C.; The Open University |
| Keywords:                     | Health policy < HEALTH SERVICES ADMINISTRATION & MANAGEMENT, Organisation of health services < HEALTH SERVICES ADMINISTRATION & MANAGEMENT, QUALITATIVE RESEARCH                                                                                                                                                                                                                                 |
|                               |                                                                                                                                                                                                                                                                                                                                                                                                  |

SCHOLARONE™  
Manuscripts

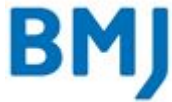

I, the Submitting Author has the right to grant and does grant on behalf of all authors of the Work (as defined in the below author licence), an exclusive licence and/or a non-exclusive licence for contributions from authors who are: i) UK Crown employees; ii) where BMJ has agreed a CC-BY licence shall apply, and/or iii) in accordance with the terms applicable for US Federal Government officers or employees acting as part of their official duties; on a worldwide, perpetual, irrevocable, royalty-free basis to BMJ Publishing Group Ltd ("BMJ") its licensees and where the relevant Journal is co-owned by BMJ to the co-owners of the Journal, to publish the Work in this journal and any other BMJ products and to exploit all rights, as set out in our [licence](#).

The Submitting Author accepts and understands that any supply made under these terms is made by BMJ to the Submitting Author unless you are acting as an employee on behalf of your employer or a postgraduate student of an affiliated institution which is paying any applicable article publishing charge ("APC") for Open Access articles. Where the Submitting Author wishes to make the Work available on an Open Access basis (and intends to pay the relevant APC), the terms of reuse of such Open Access shall be governed by a Creative Commons licence – details of these licences and which [Creative Commons](#) licence will apply to this Work are set out in our licence referred to above.

Other than as permitted in any relevant BMJ Author's Self Archiving Policies, I confirm this Work has not been accepted for publication elsewhere, is not being considered for publication elsewhere and does not duplicate material already published. I confirm all authors consent to publication of this Work and authorise the granting of this licence.

1  
2  
3  
4  
5 The developing architecture of system management in the English NHS: evidence from a  
6 qualitative study of three Integrated Care Systems  
7  
8  
9

10 Authors

11 Marie Sanderson ([Marie.Sanderson@lshtm.ac.uk](mailto:Marie.Sanderson@lshtm.ac.uk))

12  
13 Pauline Allen ([Pauline.Allen@lshtm.ac.uk](mailto:Pauline.Allen@lshtm.ac.uk))

14  
15 Dorota Osipovic ([Dorota.Osipovic@lshtm.ac.uk](mailto:Dorota.Osipovic@lshtm.ac.uk))

16  
17 Christina Petsoulas ([Christina.Petsoulas@lshtm.ac.uk](mailto:Christina.Petsoulas@lshtm.ac.uk))

18  
19 Olga Boiko ([olga.boiko1@gmail.com](mailto:olga.boiko1@gmail.com))

20  
21 Colin Lorne ([colin.lorne@open.ac.uk](mailto:colin.lorne@open.ac.uk))  
22  
23  
24  
25  
26  
27  
28  
29

30 Corresponding author: Dr Marie Sanderson, HSRP, LSHTM, 15-17 Tavistock Place, London,  
31 WC1H 9SH, [Marie.Sanderson@lshtm.ac.uk](mailto:Marie.Sanderson@lshtm.ac.uk)  
32  
33  
34  
35

36 Word count: 6393  
37  
38  
39  
40  
41  
42  
43  
44  
45  
46  
47  
48  
49  
50  
51  
52  
53  
54  
55  
56  
57  
58  
59  
60

## Abstract

### **Objective**

Integrated Care Systems (ICSs) mark a change in the English NHS from competitive to more collaborative methods of inter-organisational working. We explored how effective the ICS form of collaboration is in achieving its goals, by investigating how ICSs were developing, how system partners were balancing organisational and system responsibilities, how partners could be held to account and how local priorities were being reconciled with ICS priorities.

### **Design**

We carried out detailed case studies in three ICSs, each consisting of a system and its partners, using interviews, documentary analysis and meeting observations.

### **Setting/participants**

We conducted 64 in-depth, semi-structured interviews with Director level representatives of ICS partners and observed eight meetings (three in Case Study 1, three in Case Study 2 and two in Case Study 3).

### **Results**

Collaborative working was welcomed by system members. The refinement and agreement of local governance arrangements was ongoing and challenging. System members found it difficult to balance system and individual responsibilities, with concerns that system priorities could run counter to organisational interests. Conflicts of interest were seen as inherent, but the benefits of collaborative decision making were perceived to outweigh risks. There were multiple examples of work being carried out across systems and 'places' to share resources, change resource allocation and improve partnership working. Some interviewees reported reticence addressing difficult issues collaboratively, and that organisations' statutory accountabilities were allowing a 'retreat' from the confrontation of difficult issues facing systems, such as agreeing action to achieve financial sustainability.

### **Conclusions**

There remain significant challenges regarding agreeing governance, accountability and decision making arrangements which are particularly important due to the recent Health and Care Act 2022 which give ICSs allocative functions for the majority of health resources for

1  
2  
3 local populations. An independent arbiter may be required to resolve disputes, along with  
4 increased support for shaping governance arrangements.  
5  
6  
7  
8  
9

## 10 **Article summary**

### 11 **Strengths and limitations of this study**

- 12
- 13
- 14
- 15 • This qualitative study provides unique, contextually rich insight into the development  
16 of Integrated Care Systems in the English NHS between 2019 and 2021
- 17 • This study uses only three in-depth case studies, so it may not be representative of all  
18 national developments.
- 19 • Phase 1 of the fieldwork (conducted between December 2019 and March 2020), was  
20 cut short due to the COVID-19 pandemic and we were not able to interview all  
21 partners in our case studies. This restriction may have reduced nuance in the findings  
22 of this report.  
23  
24  
25  
26  
27  
28

29 Keywords: NHS, integration, collaboration, governance, inter-organisational  
30  
31  
32  
33  
34  
35  
36  
37  
38  
39  
40  
41  
42  
43  
44  
45  
46  
47  
48  
49  
50  
51  
52  
53  
54  
55  
56  
57  
58  
59  
60

The developing architecture of system management in the English NHS: evidence from a qualitative study of three Integrated Care Systems

Sanderson, M., Allen, P., Osipovic, D., Petsoulas, C., Boiko, O., Lorne, C.

## POLICY BACKGROUND

Integrated Care Systems (ICSs) are a policy initiative in the English NHS (NHS, hereafter) whereby local ‘systems’ of providers and commissioners of NHS services, together with local authorities and other local partners (such as voluntary and community sector organisations) collectively plan health and care services for local populations. The approach is expected to achieve improved outcomes in population health and healthcare, reductions in inequalities in outcomes, experience and access, and enhanced productivity and value for money, in addition to helping the NHS to support wider social and economic development (1). In stark contrast with the growing salience of ICSs, there is a paucity of empirical research concerning collaborative decision making in ICSs in practice. It is particularly important to examine the ICS model now given the recent Health and Care Act (HCA 2022) which puts ICSs on a statutory footing from July 2022, and gives them allocative functions for the majority of health resources for local populations. This paper reports a recent study examining how ICSs are developing and how effective the ICS form of collaboration is as a means to achieve its goals.

In order to understand the ICS model, it is necessary to first clarify ICS policy and situate ICSs within the wider context of the NHS. The development of ICSs is at the forefront of a major change in English NHS policy whereby, alongside the ‘command and control’ hierarchy with top down budget allocation and bottom up accountability, collaboration between local organisations is positioned as the dominant approach to the planning and provision of local health services. The emphasis on local collaboration has been accompanied by a move away from the use of market-like mechanisms. NHS policy now describes competition as ‘*transactional bureaucracy*’ standing in the way of ‘*sensible decision making*’ (2) and the proposed legislative changes will formally remove competition as a co-ordinating force in the NHS.

With publication of *The Five Year Forward View* (3), which laid out a vision to improve care delivery through breaking down barriers between different organisations and care sectors,

1  
2  
3 ‘integration’ became a formal policy objective.<sup>1</sup> This led to policy initiatives which focused on  
4 improving the co-ordination of service provision across organisational boundaries such as the  
5 Vanguard New Care Models programme and the Integrated Care and Support Pioneers  
6 exemplars (5-7). Alongside these developments, Sustainability and Transformation Plans were  
7 first introduced in 2015 as NHS organisations and local authorities (which are responsible for  
8 social care provision) were asked to work together to develop services for their local population  
9 (8). Sustainability and Transformation Partnerships (STPs) and ICSs (a more ‘mature’ form of  
10 STPs) were introduced from 2016<sup>2</sup> as ‘bottom-up’ partnership arrangements, bringing together  
11 local organisations to deliver the ‘triple integration’ of primary and specialist care, physical  
12 and mental health services, and health with social care (10).

21  
22 The core tenet underlying ICSs is that the health and care needs of local populations will be  
23 best met if organisations planning and providing health and care services to that population  
24 agree collective strategies for resource utilisation. The 42 ICSs across England follow a three-  
25 tier geographically-defined model (systems, places and neighbourhoods) in which  
26 collaboration at each scale addresses different aims. ‘Systems’ (population size of 1-3 million  
27 covering the whole ICS footprint), collective decision making focuses on strategic change, the  
28 development of governance and accountability arrangements, the management of performance  
29 and collective resources and identification and sharing of best practice. ‘Places’ within systems  
30 (population size of 250,000 – 500,000 and organised typically at borough/local authority level)  
31 are expected to focus on service integration, the development of anticipatory care, out of  
32 hospital care and hospital discharge. ‘Neighbourhoods’ (population size of 35,000-50,000 and  
33 based around non-statutory Primary Care Networks (PCNs) of groups of GP practices) are  
34 expected to improve integration of primary health services with community health care services  
35 and other local health and care organisations. In practice systems (and ‘places’ and  
36 ‘neighbourhoods’) vary considerably in terms of population size and organisational  
37  
38  
39  
40  
41  
42  
43  
44  
45  
46  
47  
48  
49

---

50  
51 <sup>1</sup> There is no single definition of integration, and the term is used to encapsulate a variety of types of co-  
52 operation including integration at service, organisational or clinical level, at macro level (across a population),  
53 meso level (for a particular patient group) and at micro level (for individual patient) (see 4. Heenan D,  
54 Birrell D. The integration of health and social care in the UK: policy and practice. London: Palgrave; 2018.)

55  
56 <sup>2</sup> STPs were in existence until April 2021 when the last remaining STPs in England gained ICS status. For reasons  
57 of clarity, this paper will use the term ICS only. A more detailed explanation of the development of STPs and  
58 ICS is given by 9. Lorne C, Allen P, Checkland K, Osipovic D, Sanderson M, Hammond J, et al. Integrated Care  
59 Systems: What can current reforms learn from past research on regional co-ordination of health and care in  
60 England? A literature review. PRUComm, 2019.



1  
2  
3 complexity, reflecting local factors such as demography and existing networks of collaboration,  
4 and may elude neat containment within coherent territorial geographies (11).  
5  
6  
7  
8

9 It is particularly important to examine how ICSs are developing as the 'system' has become  
10 the central mechanism through which the achievement of NHS goals is co-ordinated. Systems  
11 are expected to develop co-ordinated plans for NHS activity, workforce and money. The  
12 approach taken by the NHS economic and structural regulator - NHS England and  
13 Improvement (NHSEI) - is tailored to give primacy to the system in financial and performance  
14 matters, alongside NHS organisations' individual accountabilities (which remain unaffected)  
15 (12). Additionally, financial rewards are being linked to system rather than individual  
16 organisation performance, such as linking the attainment of system financial targets to financial  
17 rewards for individual NHS organisations (13).  
18  
19  
20  
21  
22  
23  
24  
25  
26

27 ICSs are set to become even more significant bodies. The recent HCA 2022 puts ICSs on a  
28 statutory footing from July 2022, consisting of a dual structure of a statutory body, the  
29 Integrated Care Board (ICB) (focused on integration within the NHS and accountable for NHS  
30 resources), and a statutory committee, the Integrated Care Partnership (ICP) (focused on  
31 integration between NHS, local government and wider partners). Clinical Commissioning  
32 Groups (the current commissioning bodies) will be abolished with the transfer of allocative  
33 functions to the ICBs. Consequently ICBs will have responsibility for commissioning acute,  
34 community and mental health NHS services for their population, primary medical care, with  
35 possible further delegations from NHSE including other primary care budgets.  
36  
37  
38  
39  
40  
41  
42  
43  
44

45 Given this developing context, it is important to understand how governance, accountability  
46 and decision making arrangements are structured in ICSs, and how these arrangements might  
47 equip ICSs to meet their aims. ICS policy does not explicitly draw on theory to explain how  
48 the use of collaborative decision-making processes will lead to the attainment of ICS aims such  
49 as enhancing productivity and value for money. We suggest that a relevant field of scholarship  
50 is economic theories of cooperation, which can inform understanding of the circumstances in  
51 which organisations and individuals are willing and able to cooperate with each other. It has  
52 been suggested that work of Ostrom (14, 15) can be used to develop principles through which  
53 communities of health and care organisations in the English NHS can develop their own  
54  
55  
56  
57  
58  
59  
60

1  
2  
3 arrangements for managing shared resources (16, 17). Ostrom's work contends that  
4 communities can agree rules governing use of limited shared resources and that this can result  
5 in better use of resources than co-ordination through the market or through hierarchy. Central  
6 principles include the need for communities to set up clear boundaries and membership, agree  
7 for themselves rules regarding how resources will be used, and agree the process for monitoring  
8 of behaviour and sanctions. However, it is important to engage critically with the way such  
9 approaches function in the particular institutional context of the NHS, just as research has  
10 previously engaged with the use of competition and the market in the NHS. Indeed, studies of  
11 competition in the NHS have shown us that the market did not work in the NHS as intended,  
12 and policy failed to sufficiently account for the particular context of the NHS, and the nature  
13 of health care as a service (18-20).

22  
23 Accordingly, it is important to understand collaboration within the wider institutional context  
24 of the NHS. There is a number of aspects of ICS policy which are particularly significant in  
25 this regard. Firstly, is the considerable freedom allowed to ICSs to decide their own governance  
26 arrangements. ICSs are 'bottom-up' partnership arrangements, meaning that rather than issuing  
27 a prescribed national blueprint the national policy approach to ICS governance is permissive.  
28 Each ICS can currently tailor governance arrangements to suit local circumstances, within  
29 minimum governance requirements for a 'Partnership Board' which provides a forum for  
30 collective action on issues that affect all system members (10). This minimal and permissive  
31 approach will remain the case under the HCA 2022. The permissive nature of local governance  
32 has significant implications when coupled with the principle of subsidiarity (where decisions  
33 are taken closest to those affected). This is particularly so in light of HCA 2022 which carries  
34 the expectation that statutory ICBs will delegate substantial decision-making regarding the  
35 allocation of resources to committees and sub-committees, such as 'place-based committees'  
36 and provider collaboratives (non-statutory partnership arrangements involving two or more  
37 trusts) (21, 22), for which there are no national governance requirements. It is therefore  
38 important to understand how ICSs are currently addressing the challenge of agreeing local  
39 governance arrangements while addressing the principle of subsidiarity.

53  
54 A second important aspect of ICS collaboration relates to organisational sovereignty. ICS  
55 partners retain the authority to govern themselves, with freedom to make their own decisions.  
56 Participation in ICSs is voluntary (although effectively is mandated by NHS policy for NHS  
57 organisations), and ICS decision-making is non-binding and consensual (subject to collective  
58  
59  
60

1  
2  
3 agreement). All system partners have their own accountabilities and statutory responsibilities  
4 which they must hold in regard when agreeing collective system plans. For example NHS  
5 Trusts and Foundation Trusts (FTs) have legal duties to provide safe care and treatment (HSCA  
6 2008) and FT boards have a duty to act with a view to promoting the success of the Trust to  
7 maximise the benefits for the members of the Trust as a whole and for the public (HSCA 2012).  
8 NHS Trusts and FTs have direct accountability to NHS England for their performance.  
9 Similarly, system partners from outside the NHS, such as local government or independent  
10 sector organisations, are subject to separate institutional contexts regarding priorities, ways of  
11 working and financial rules. Thirdly, ICSs exist in a complex landscape of pre-existing  
12 partnerships and planning networks which must be accounted for, such as Health and  
13 Wellbeing Boards (formal committees of Local Authorities, which have a statutory duty, with  
14 CCGs, to produce joint strategic needs assessments and joint health and wellbeing strategies  
15 for their local population).

16  
17 All these complexities raise questions about how collaborative decision making in ICSs will  
18 work in practice, which it is important to address in light of the growing prominence of ICSs.  
19 A small number of empirical studies have been published which are concerned with the  
20 development of collaborative arrangements within ICSs (23-28), and the development of  
21 commissioning in the light of system collaboration (29, 30). The study reported in this paper  
22 makes a significant contribution to this empirical evidence by providing a nuanced analysis of  
23 the development of governance, accountability and decision making arrangements in three  
24 ICSs.

## 25 26 27 28 29 30 31 32 33 34 35 36 37 38 39 40 41 **STUDY QUESTIONS**

42 Our research questions were based on our understanding of current ICS policy, and the  
43 literature regarding economic theories of co-operation, in particular the work of Ostrom (14).  
44 The questions focus on three broad areas: firstly, how decisions are being made in ICSs;  
45 secondly, how ICS partners are balancing collective and individual interests; and thirdly, what  
46 kind of decisions systems are making regarding the allocation of resources.

47  
48 In relation to the first area, how decisions are being made in ICSs, we wanted to establish: how  
49 the local leadership and cooperative arrangements with stakeholders (statutory, independent  
50 and community-based, including local authorities) were governed in light of policy  
51 recommendations. Secondly, in terms of the balancing of collective and individual interests,  
52 the study addressed: how individual organisations are reconciling their role in an ICS with their  
53  
54  
55  
56  
57  
58  
59  
60

1  
2  
3 individual roles, accountabilities and statutory responsibilities. Thirdly, we wanted to establish  
4 what decisions regarding the allocation of resources are being made through ICSs, in particular  
5 whether ICSs are able to allocate resources more efficiently across sectoral boundaries and  
6 bring their local health economies into financial balance.  
7  
8  
9

10  
11 Our research was divided into two phases. The first phase focused on the system scale. In the  
12 second phase of our research we addressed similar questions while focusing on the  
13 development of ‘place-based partnerships’, and the developing role of the regional NHSEI  
14 function (regional teams which are responsible for the quality, financial and operational  
15 performance of all NHS organisations in their area).  
16  
17  
18

## 19 20 **STUDY DESIGN**

21  
22 The study used qualitative methods with an additional quantitative component. The results of  
23 the quantitative analysis are included in our final report (31). Primarily, we used a case study  
24 research design, consisting of three in-depth case studies, each consisting of a system and its  
25 partners. The use of case studies was thought to be the most appropriate research design for  
26 this study as interviews and documentary analysis were informed by the contextual information  
27 we were able to gather by concentrating on three specific systems. An initial literature review  
28 of NHS systems governance (9) was drawn on to inform strategy when selecting case study  
29 sites. We identified local authority configuration, system boundaries, private sector and/or  
30 social enterprise partners and concentration of providers as characteristics of interest to the  
31 study, and we sought to recruit case study sites which demonstrated variance across these  
32 characteristics. Additionally, as we were also interested in the role of the regional NHSEI  
33 function, we sought to identify case study sites from a variety of regions. In Phase 2 of the  
34 research ‘places’ were shortlisted based on characteristics of interest emerging from the Phase  
35 1.  
36  
37  
38  
39  
40  
41  
42  
43  
44  
45

46  
47 The first phase of fieldwork was undertaken between December 2019 and March 2020 and  
48 focused on studying ICSs (and their predecessor STPs). Fieldwork was interrupted in March  
49 2020 by the COVID-19 pandemic. The second phase of fieldwork took place between January  
50 2021 and September 2021 and focused on a more detailed examination of a selected ‘place’  
51 within each of our case studies. We conducted a total of 64 in-depth, semi-structured interviews  
52 (see Tables 1 and 2) and observed eight system level meetings (three in CS1, three in CS2 and  
53 two in CS3). Interviewees were recruited due to their role as senior management  
54 representatives of system partners who participated in the main decision-making forums at  
55  
56  
57  
58  
59  
60

system scale, and within the selected 'place'. All participants gave informed consent. Topic guides related to the study questions described above. The purpose of observing a variety of meetings was to supplement the information we obtained from interviews. In addition, we gathered documentation from all three case study sites which included strategic plans, meeting papers and details of governance structures. These sources were used to add detail to the interview accounts.

*Table 1: Phase 1 interviews by case study site and organisational type*

| Organisation      | Case Study 1 | Case Study 2 | Case Study 3 | Total interviews |
|-------------------|--------------|--------------|--------------|------------------|
| ICS leadership    | 2            | 4            | 2            | 8                |
| CCG               | 0            | 1            | 1            | 2                |
| NHS Providers     | 3            | 3            | 4            | 10               |
| Local Authorities | 1            | 1            | 4            | 6                |
| Primary Care      | 0            | 0            | 0            | 0                |
| Other Providers   | 0            | 2            | 0            | 2                |
| Total interviews  | 6            | 11           | 11           | 28               |

*Table 2: Phase 2 interviewees by case study site and organisational type*

| Organisation     | Case Study 1 | Case Study 2 | Case Study 3 | Total interviewees |
|------------------|--------------|--------------|--------------|--------------------|
| ICS leadership*  | 2            | 2            | 3            | 7                  |
| Regional NHSEI   | 1            | 1            | 1            | 3                  |
| CCG              | 3            |              | 5            | 8                  |
| NHS Providers    | 2            | 2            | 3            | 7                  |
| Local Government | 1            | 2            | 3            | 6                  |
| Primary Care     | 1            | 1            | 1            | 3                  |
| Other Providers  |              | 1            |              | 1                  |
| Other            |              | 1            |              | 1                  |
| Total interviews | 10           | 10           | 16           | 36                 |

\*Where an interviewee held a joint ICS/CCG role, this is recorded as an ICS leadership interviewee

The three case study sites (which consisted of one ICS and two STPs at the time of recruitment) are located in different parts of England. CS1 covers an urban population, has complicated boundaries and includes 5 unitary authorities. CS2 system shares near coterminosity with the county council, and system partners include social enterprises. CS3 system has a large geographical footprint, and a complex, multi-layered governance structure across NHS and local government.

PA, MS, DO and CL agreed the theoretical framework, and the main themes derived from the research questions. MS, DO and CP agreed additional themes emerging from the data. These themes were used to analyse the data. The interviews were transcribed, and coded (by MS, DO, OB, CL and CP) using the agreed coding framework. The principal researchers (MS, DO and CP) met periodically to check whether the coding framework was working well, to discuss

1  
2  
3 emerging findings, and check researchers' interpretation of the data and areas of difference  
4 between the case studies and to agree to any necessary modifications to the coding framework.  
5  
6

### 7 **Patient and Public Involvement**

8  
9 No patients or public were involved in this study.  
10

## 11 **RESULTS**

12  
13 Our findings are grouped into three sections, each relating to a significant aspect of ICS  
14 decision-making. Firstly, the development of decision-making arrangements in ICSs, secondly  
15 how organisations are reconciling systems and individual roles, and thirdly the kind of  
16 decisions ICSs are making regarding the allocation of resources.  
17  
18  
19  
20

### 21 **Development of decision-making arrangements**

22  
23 System partners were generally enthusiastic about the value of increased collaboration, seeing  
24 this as the best way to achieve better use of resources and health improvement across health  
25 and social care. The views of local authorities were mixed, viewing system development as  
26 both an opportunity and with a dose of scepticism. They were keen to be involved in  
27 arrangements as an equal partner, and not the '*last thing that you come to*' in a health focused  
28 system (Local Authority Director 4, CS3). Non-NHS partners also viewed ICSs with  
29 scepticism, for example the emphasis on achieving financial balance in the NHS was seen by  
30 some as illustrating the NHS-centric focus.  
31  
32  
33  
34  
35  
36  
37  
38

39 The refinement of governance arrangements was an ongoing task for local partners. Part of this  
40 task was agreeing the spatial configurations of systems and 'places'. We found that agreement  
41 between health and local government of the 'best' spatial configurations were of particular  
42 importance to ensuring clarity of governance arrangements. In two of our case studies (CS1  
43 and CS2) local partners appeared to be in agreement regarding the most sensible system and  
44 'place' configurations. In CS3 however, trying to reach consensus among partners was a  
45 lengthy process, making it difficult to progress integration, a process described as '*building the*  
46 *aeroplane while flying it at multiple levels*'. (NHS Trust Director, Borough-based partnership  
47 1, CS3). In this case, local government configurations were perceived to be a particularly  
48 awkward fit at the system level due to the sheer volume of organisations involved. Local actors  
49 deviated from the system/place division in favour of a 'double-layer' set up, exemplified by  
50 the presence of an intermediate subsystem level (i.e. the upper tier place-based partnership)  
51 which lay between the lower tier (borough-based) place partnerships and the ICS, described by  
52  
53  
54  
55  
56  
57  
58  
59  
60

1  
2  
3 one interviewee as “*systems within systems within systems*” (Local Authority Director 1, CS3).  
4 This arrangement was thought to reflect more accurately local configurations, but was also  
5 acknowledged, due in part to the lack of uniformity, to remain complex, risking confusion and  
6 lack of clarity in governance arrangements.  
7  
8  
9

10  
11 Beyond the local agreement of spatial configurations, system partners were finding agreeing  
12 local governance arrangements inherently challenging. This was seen to reflect both the scale  
13 of the system agenda and the already complex institutional landscape in which ICSs were  
14 situated:  
15  
16  
17

18  
19 *‘Achieving clarity over where you make decisions, who makes decisions, and then who*  
20 *enacts them is really difficult, and you often only find out you’ve got it wrong by doing*  
21 *it...this is bottom up, and it’s to take into account statutory body decision making, trying*  
22 *to make use of architecture that was already there, and then linking it all together. And*  
23 *every time we do it, we find other bits that we then add in, because it’s just reflective of*  
24 *the size of the remit of an ICS’* (ICS Director 1, CS2)  
25  
26  
27  
28  
29

30 The drive to establish partnership working at the lowest possible level, in line with the principle  
31 of subsidiarity, was hampered by a lack of clarity both from national policy and locally on how  
32 to distribute power, resources and responsibilities between different levels of governance.  
33 Local actors in all three case studies found it challenging to decide what decisions and functions  
34 should sit where. Going through these arrangements locally on a case by case basis was a time  
35 consuming and complex process, which was particularly difficult given the shifting sands of  
36 policy, the prioritisation of the COVID-19 response and, in some instances, the existence of  
37 power dynamics regarding who the decision makers were.  
38  
39  
40  
41  
42  
43

44 Increasingly, formal governance arrangements were being developed which included an  
45 emerging focus on the prioritisation of ‘place’ collective voice over representation of individual  
46 organisations. All of our case studies were considering the adoption of a formal partnership  
47 arrangement in places, such as an Alliance agreement, although only one (CS2) had adopted a  
48 formal Alliance agreement. There was some frustration regarding the effort expended on the  
49 establishment and refinement of governance and the perceived added value of this activity. As  
50 the lead of a place-based partnership observed, informal relationships between partners were  
51 more important to the achievement of collaboration than formal governance arrangements:  
52  
53  
54  
55  
56  
57  
58  
59  
60

1  
2  
3 *'I think you can easily really get quite led astray on the governance. You can easily*  
4 *spend years and years doing the governance. But I think in reality it's very difficult in*  
5 *governance terms and in NHS contracting terms to force an organisation to do*  
6 *something they don't want to do, and actually in all my years, and I've got many years,*  
7 *actually, in reality I've hardly ever voted on a board, hardly ever had to have a count*  
8 *up of those, and I've hardly ever gone through any sort of legal proceedings on NHS*  
9 *contracts'* (Place Director, CS 2)  
10  
11  
12  
13  
14  
15

16 Others experienced governance architecture as significant. For example, smaller partners such  
17 as GPs, and those who were not often previously invited to the table, such as District Councils,  
18 welcomed the formal structures which allowed them an equal voice in discussions.  
19  
20  
21

### 22 **Reconciliation of system and individual responsibilities**

23

24 The reconciliation of system and individual responsibilities had been aided by an ongoing shift  
25 from competition to collaborative working, and a changing environment regarding  
26 commissioning mechanisms, pricing structures and financial incentives. In the second phase of  
27 the research, the changing financial regime in response to COVID-19 was reported to have  
28 '*completely rewritten the rulebook*' (ICS Director 2, CS2), moving to block contract payments  
29 'on account' for all NHS providers, with suspension of the Payment By Results (PBR) national  
30 tariff.<sup>3</sup>  
31  
32  
33  
34  
35  
36

37 While incentives for competition among providers had subsided, organisations were still  
38 finding it challenging to balance system and individual responsibilities. Among NHS partners  
39 there was scepticism about the effectiveness of financial incentives to encourage NHS  
40 organisations to favour a system perspective. In the first phase of our research the notion of  
41 achieving financial balance within systems was viewed as unrealistic, unattainable, and  
42 unsupported by the wider regulatory context. In the second phase, interviewees were concerned  
43 that while the Elective Recovery Fund (additional funding for clearing the elective backlog  
44 created by COVID-19) was encouraging organisations to make plans together, it was not a  
45 sufficient mechanism to stop individual organisations giving priority to their organisational  
46 interests and patients. One Acute Trust Director saw a clear tension between '*the glib [regional*  
47  
48  
49  
50  
51  
52  
53  
54  
55  
56  
57  
58

---

59 <sup>3</sup> PBR is a prospective payment system, associated with incentives for competition, in which each episode of  
60 care is charged at national tariff rates



1  
2  
3 *NHSE/IJ* vision that we've all suddenly switched to managing waiting lists as a sector' and  
4 what they saw as the duty of NHS Trusts to prioritise their own patients:  
5  
6

7 *'There's a huge variation in the scale and nature of the problem in the different*  
8 *organisations, and we at [hospital] hold most of the problem on elective recovery in*  
9 *terms of the long waits. And if everybody were to suddenly use all their capacity then,*  
10 *for the good of the system, some organisations wouldn't do any operating on their own*  
11 *patients for a very long time, they would spend a long time operating on our patients*  
12 *and not much else. And that's not really a proposition that you can put to the statutory*  
13 *body and expect it to accept that, so while we're making incremental steps in that*  
14 *direction, they know that's not feasible'. (Director, Acute Trust, CS3)*  
15  
16  
17  
18  
19  
20  
21

22 Provider concerns that system priorities could run counter to organisational interests were  
23 prevalent. On the one hand, some interviewees were quite sanguine about the prospect of  
24 dropping some of their organisational priorities in favour of shared priorities, if this led to an  
25 improvement of services in the locality. For example, an Acute Trust Director suggested that  
26 the Trust would be prepared to spend extra money on areas of need, such as housing, and other  
27 services rather than spending it on their own hospital. Others, however, reflected on the  
28 potential risks of collective decision making in the light of individual organisation's statutory  
29 responsibility to ensure that risks to the organisation and the public were mitigated effectively.  
30 One Acute Trust CEO summarised it thus:  
31  
32  
33  
34  
35  
36  
37

38 *'So then you get into a conversation, well, maybe there's horse trading to be done in*  
39 *the system, which is I expect what the centre thinks, they think, well, they will just have*  
40 *to agree across the system to cut their cloth if you like...X Hospital needs a new roof*  
41 *which is more important than my theatres because the rain gets in on the patients...I*  
42 *mean, if a woman in my organisation dies of some hideous infection after she's had her*  
43 *section, I wonder who's going to be in the coroner's court explaining why we let her be*  
44 *operated on in an operating theatre that I knew wasn't meeting the standard. It's really*  
45 *tricky, isn't it?'* (Director, Acute NHS FT, CS2)  
46  
47  
48  
49  
50  
51  
52

53 Horizontal accountability between system partners (observed in 'network' forms of co-  
54 ordination, with individual organisations holding each other to account) was reported across  
55 our case studies to be currently weak, characterised by 'softer' mechanisms of holding to  
56 account through trust, rather than in a formal or codified way.  
57  
58  
59  
60

1  
2  
3 A further perspective on balancing system and individual priorities was provided by local  
4 authority and independent sector interviewees. From the local authority perspective, the wider  
5 institutional context was not conducive to system working due to differences in business and  
6 planning cycles between health and local government, the wider remit of local councils (of  
7 which social care was only a part) and differing approaches to procurement. In cases where  
8 system and local authority footprints were not aligned, local authorities were more reluctant to  
9 engage in strategic commissioning and planning discussions. Local authority interviewees  
10 were also concerned about their potential exposure to financial risk, and loss of control over  
11 limited council resources. Meanwhile a social enterprise interviewee suggested that balancing  
12 individual and system roles was very difficult for independent sector organisations, who had  
13 obligations to break even and sat outside the supportive policy context of the NHS.  
14  
15  
16  
17  
18  
19  
20  
21  
22

23 System partners acknowledged that, as system commissioning responsibilities evolved,  
24 conflicts of interest were inherent in this partnership mode of decision making, but believed  
25 that the benefits of collaborative decision making outweighed the risks of conflicting interests.  
26 In terms of overcoming conflicts of interest, it was thought that conventional methods of  
27 addressing conflicts, most commonly by removing the conflicted party from the decision-  
28 making process, were insufficient as everyone was an interested party with a potential conflict.  
29 It was hoped that the close collaborative environment and peer monitoring would guard against  
30 abuses of influence, and that the consensus model of decision making would allow objections  
31 to be voiced.  
32  
33  
34  
35  
36  
37  
38  
39

#### 40 **Decisions regarding resource allocation being made by systems**

41  
42 Our research was conducted during the early days of system working, and due to the disruption  
43 caused by the COVID-19 pandemic, it is difficult to assess the extent to which ICSs are  
44 achieving their aims concerning the allocation of resources more efficiently and financial  
45 balance within the system. We gathered multiple examples of work being carried out across  
46 systems and ‘places’ to share resources, change resource allocation and improve partnership  
47 working (see Table 3 below for examples of work at place scale). However local actors  
48 acknowledged that the impact of these initiatives in terms of efficiencies and quality markers  
49 is difficult to quantify.  
50  
51  
52  
53  
54  
55  
56

57 Table 3: Examples of work being carried out at place scale

| 58 Case Study | 59 Examples of partnership working in ‘places’ |
|---------------|------------------------------------------------|
| 60 CS1        | Development of data driven approach to care    |

|     |                                                                                                                                                                                                                                                                                                                                                                                                                                                                                                                                                                                                               |
|-----|---------------------------------------------------------------------------------------------------------------------------------------------------------------------------------------------------------------------------------------------------------------------------------------------------------------------------------------------------------------------------------------------------------------------------------------------------------------------------------------------------------------------------------------------------------------------------------------------------------------|
|     | <ul style="list-style-type: none"> <li>• Establishment of population health unit across local authority and acute trust</li> <li>• Data sharing across primary and secondary care</li> </ul> <p>Appointment of Health Aging Co-ordinators across social, primary and secondary care<br/>Development of system-wide pathways, such as end of life care strategy</p>                                                                                                                                                                                                                                            |
| CS2 | <p>Resolution of operational performance issues, including day to day capacity management<br/>Work with wider partners to situate services outside hospital, including development of new premises<br/>Development of key worker affordable housing on hospital site<br/>Development of opportunities for shared service delivery, such as urgent treatment centre<br/>Decisions regarding the distribution of non-recurrent funding<br/>Development of 'integrated delivery units' such as discharge team with jointly funded lead<br/>Pilot for 'step-down' nursing provision to aid hospital discharge</p> |
| CS3 | <p>At intermediate subsystem tier:</p> <p>Sharing best practice across boroughs<br/>Performance management and assurance<br/>Resource allocation<br/>Operational command for COVID-19</p> <p>In borough-based partnerships:<br/>Development of 'multi-disciplinary discharge hubs'<br/>Pathway development for interface between hospital and wider system<br/>Operational collaboration during COVID-19 response<br/>Development of shared workforce strategy<br/>Decisions regarding the distribution of, COVID-19 contingency funding</p>                                                                  |

At system scale agreements had been reached to share resources in order to take advantage of economies of scale, and offer mutual support. A common focus was sharing staff (both managerial and clinical) between providers with a view to helping to improve performance, sharing best practice and expertise, joint staff bank, a virtual academy.

In Phase 1 of the research system control totals were having some perverse effects in our case studies. In some instances financially well-performing providers were asked to subsidise those in financial difficulty, which was in the spirit of sharing resources across the system. However, a more widespread behaviour appeared to be that the system control total was reached through skilful negotiation, clever accounting ('*herding of the finance cats*' (STP Director 1, CS3) and non-recurrent means such as the resolution of 'income anomalies' and land sales. While systems were engaged in negotiating actions to achieve long term financial sustainability, for example to spend more in primary/community services, increase digital interventions, reduce duplication of functions across organisations, and limit ineffective procedures, this had not yet translated into specific agreements in practice. In CS2, forthcoming work to decide functions to be shared across acute hospitals, and reduce face to face outpatient appointments, was expected to be a '*really difficult and painful*' process (ICS Director 3, CS2).

1  
2  
3 Some interviewees reported there was reticence addressing such difficult issues in ICS forums  
4 due to the partnership decision-making model. Place-based partnerships, due to the informal  
5 nature of their working, were not seen as an appropriate forum for disagreement and difficult  
6 discussions. An ICS Director in CS3 suggested that, instead, these sorts of issues were still  
7 resolved bilaterally between the parties directly involved. An Acute Trust Director in CS2  
8 noted it was difficult to discuss performance issues, particularly at a time when service  
9 providers were under a great deal of strain due to the response to COVID-19, and in light of  
10 voluntary nature of co-operation. Furthermore, the CS2 ICS Accountable Officer suggested  
11 organisations' statutory accountabilities were allowing a 'retreat' from the confrontation of  
12 difficult issues facing systems, such as agreeing action to achieve financial sustainability.  
13  
14  
15  
16  
17  
18  
19

## 20 21 **DISCUSSION AND CONCLUSION**

22  
23 Our findings indicate that the shift to collaborative working in the NHS has been largely  
24 welcomed. The institutional context in the NHS is reshaping to accommodate collaborative  
25 approaches: commissioning mechanisms, pricing structures and financial incentives are subject  
26 to change, along with regulatory approaches. While progress in achieving system aims have  
27 been hampered by the operational response to the COVID-19 pandemic, local actors felt that  
28 collaboration in systems led to improvements in ways that did not occur previously and, in  
29 particular, cited many examples of changes to service delivery that had been achieved through  
30 place-based partnerships. However, our findings suggest there are challenges in making  
31 decisions through ICSs, particularly in relation to reaching agreement concerning complex  
32 and/or difficult matters. These challenges need to be recognised as statutory ICBs with  
33 allocative responsibilities come into being, and the complexity and scale of ICS activities and  
34 decisions increases.  
35  
36  
37  
38  
39  
40  
41  
42  
43

44 This study, based in case studies of three ICSs, provides a detailed and nuanced analysis of the  
45 ongoing development of ICSs, and the effectiveness of this form of collaboration as a means  
46 to achieving ICS goals. This is particularly important and timely given the legislation changes  
47 of HCA 2022 which will give ICSs allocative functions for the majority of health resources for  
48 local populations from July 2022. The study has certain limitations. *Firstly*, Phase 1 of the  
49 fieldwork (conducted between December 2019 and March 2020), was cut short due to the  
50 COVID-19 pandemic. We were not able to interview all partners in our case studies. This  
51 restriction may have reduced nuance in the findings of this report. *Secondly*, as the study design  
52 consisted of three in depth case studies, it is not possible to make statistically based  
53  
54  
55  
56  
57  
58  
59  
60

1  
2  
3 generalisations to the whole NHS. However, as the study is based on a strong theoretical  
4 framework, it is possible to make analytical generalisations.  
5  
6

7 Earlier studies of systems (23, 28) found attention in developing STPs and ICSs was focused  
8 on ground work and preliminary activities, and it is notable that system governance  
9 arrangements are still subject to ongoing refinement. Our research suggests where complexity  
10 increases, for example where there is a no 'natural fit' between the health and local government  
11 footprints, it can be very difficult for partners to move forward and agree governance  
12 arrangements. Negotiation among multiple parties to achieve clarity about governance  
13 arrangements, drain resources and consume time. Furthermore, where governance  
14 arrangements are not considered coherent or meaningful this can limit engagement of partners.  
15 This is a particular risk in relation to partners outside the NHS, most pertinently local  
16 government, where there is weaker incentivisation in the first place to engage with system  
17 working.  
18  
19  
20  
21  
22  
23  
24  
25  
26

27 There is a balance to be struck between retaining flexibility at ICS level regarding governance  
28 arrangements, and having to follow national guidance. It has been noted that the ambition for  
29 local flexibility in HCA 2022 is encouraging as it is considered a key enabler of collaboration,  
30 and there are hopes this flexibility will be protected from *'the NHS's tendency to centralise,*  
31 *which could lead to an overly prescriptive system architecture – despite everyone's best*  
32 *intentions.'* (32)see also, (33). There is a case for increased support for systems in their task of  
33 putting in place clear 'rules of the game', including additional specified 'scaffolding' shaping  
34 governance requirements such as committee membership and accountability arrangements, to  
35 avoid reinventing the wheel where local areas are all engaged in similar tasks. This is  
36 particularly pertinent in light of the lack of specification in HCA 2022 and associated guidance  
37 regarding to governance arrangements in place-based partnerships or provider collaboratives  
38 where it is anticipated many ICB functions will be delegated. However, local 'fatigue'  
39 regarding the ongoing refinement of governance arrangements should be acknowledged,  
40 particularly in light of the overriding importance of strong relationships rather than governance  
41 structures in securing collaboration in practice.  
42  
43  
44  
45  
46  
47  
48  
49  
50  
51  
52

53 Despite changes in the NHS institutional context to support adoption of 'best for system'  
54 perspective, the reconciliation of system and individual responsibilities has the potential to  
55 disrupt collaboration. Like Walshe et al (28) we found that interviewees were not convinced  
56 that the separate statutory obligations of individual organisations would always be best served  
57  
58  
59  
60

1  
2  
3 by taking decisions on a best-for-system perspective. This limits systems' capacity to address  
4 difficult issues which may involve significant losses to partners. Importantly, making ICSs  
5 statutory bodies does not overcome this problem, as partner organisations will retain their  
6 organisational sovereignty, and consequently the capacity to disagree with system proposed  
7 plans. There are changes in HCA 2022 which seek to further incentivise NHS organisations to  
8 favour a 'best for system' approach to decision making such as introducing a 'duty of co-  
9 operate' for NHS bodies and a 'triple aim' duty to consider the effects of their decisions on the  
10 better health and wellbeing of everyone, the quality of care for all patients, and the sustainable  
11 use of NHS resources. These measures may also be supported by the ongoing development of  
12 horizontal accountabilities. Still, an independent arbiter may be required to resolve disputes  
13 and it seems likely that the regional directors of NHSEI could undertake this role in practice.  
14  
15  
16  
17  
18  
19  
20  
21  
22  
23

24 Looking ahead, under HCA 2022 the collaborative approach will be applied to decisions  
25 regarding the allocation of resources. Our research raises a number of points in this regard.  
26 Firstly, the tensions in decision making in ICSs, particularly concerning addressing difficult  
27 issues, together with a lack of formal arrangements to deal with disagreements, could become  
28 significant fault lines as statutory ICBs formally assume commissioning responsibilities.  
29 Secondly, conflicts of interest in relation to commissioning decisions will be pervasive with no  
30 clear route for mitigation. Although interviewees felt negative consequences were outweighed  
31 by the benefits of collaborative decision making, arguably this issue goes to the heart of how  
32 ICBs will be able to operate in the interests of the local population as opposed to prioritising  
33 those of powerful organisations. It is not clear how, in the absence of a separate commissioning  
34 body whose sole role it is to achieve results without having undue regard to the effects on the  
35 finances of individual organisations, ICBs will be able to plan and commission services which  
36 best meet the needs of local populations. It is not clear that using the ICS model consensus will  
37 always be achieved, nor that it will be the optimum consensus for population health.  
38  
39  
40  
41  
42  
43  
44  
45  
46  
47  
48

49 In conclusion while the ICS model of collaboration has been embraced by local actors in the  
50 NHS and elsewhere, there remain significant challenges regarding agreeing governance,  
51 accountability and decision making arrangements. It is clearly important to continue to study  
52 the development of system working in the future to see how these issues are tackled as the  
53 effect of the pandemic diminishes and systems have longer experience of working together.  
54  
55  
56  
57  
58  
59  
60

### **Funding statement**

This research is funded by the National Institute for Health Research (NIHR) Policy Research Programme, conducted through the Policy Research Unit in Health and Social Care Systems and Commissioning, PR-PRU-1217-20801. The views expressed are those of the authors and not necessarily those of the NIHR or the Department of Health and Social Care.

### **Author Contributions**

All of the authors met the criteria for authorship, and were involved in the design and data analysis of the study, and contributed to the drafting, revision and finalisation of this paper. In addition, OB, CL, DO, CP and MS collected the data for this study.

### **Competing interests**

All of the authors received grant funding from the Department of Health via its Policy Research Programme for this research. No authors have had financial relationships with any organisations that might have an interest in the submitted work in the previous three years, and no authors have any other relationships or activities that could appear to have influenced the submitted work.

### **Ethics approval**

NHS research governance approval from the HRA was granted on 6 August 2019 (266175/REC ref 19/HRA/3261). Ethical approval for the study was granted by the London School of Hygiene and Tropical Medicine internal ethics committee on 23 August 2019 (Ref:17711). The research received endorsement from the Association of Directors of Adult Social Services Executive Council on 19 November 2019.

### **Data sharing statement**

No additional data are available

## References

1. NHS England, NHS Improvement. 2021/22 priorities and operational planning guidance. 2021.
2. Department of Health and Social Care. Integration and Innovation: working together to improve health and social care for all. 2021.
3. NHS England. Five Year Forward View. London: NHS England, 2014.
4. Heenan D, Birrell D. The integration of health and social care in the UK: policy and practice. London: Palgrave; 2018.
5. Billings J, Mikelyte R, Coleman A, MacInnes J, Allen P, Croke S, et al. Supporting integrated care in practice: Perceptions of a national support programme for the development of New Care Models in England. *Journal of Integrated Care*. 2020;28:27-40.
6. NHS England. New Care Models: Vanguard - developing a blueprint for the future of NHS and care services. 2016.
7. Erens B, Wistow G, Mounier-Jacli S, Douglas N, Jones L, Mannacorda T, et al. Early evaluation of the Integrated Care and Support Pioneers Programme. Final report. London: Policy Innovation Research Unit (PIRU), 2016.
8. NHS England, NHS Improvement, Care Quality Commission, Health Education England, National Institute of Health and Care Excellence, England. PH. Delivering the Forward View: NHS planning guidance. London: 2015.
9. Lorne C, Allen P, Checkland K, Osipovic D, Sanderson M, Hammond J, et al. Integrated Care Systems: What can current reforms learn from past research on regional co-ordination of health and care in England? A literature review. PRUComm, 2019.
10. NHS England. The Long Term Plan. 2019.
11. Hammond J, Lorne C, Coleman A, Allen P, Mays N, Dam R, et al. The spatial politics of place and health policy: Exploring Sustainability and Transformation Plans in English NHS. *Social Science & Medicine*. 2017;190:217-26.
12. NHS England and NHS Improvement. NHS System Oversight Framework 2021/22. 2021.
13. NHS England and NHS Improvement. NHS Operational Planning and Contracting Guidance 2019/20. 2019.
14. Ostrom E. Neither market nor state: governance of common-pool resources in the twenty-first century. 1994.
15. Ostrom E. Governing the commons, The evolution of institutions for collective action. Cambridge: Cambridge University Press; 1990.
16. Sanderson M, Allen P, Moran V, McDermott I, Osipovic D. Agreeing the allocation of scarce resources in the English NHS: Ostrom, common pool resources and the role of the state. *Social Science & Medicine*. 2020:112888.
17. Ham C, Alderwick H. Place-based systems of care. A way forward for the NHS in England. London: The King's Fund, 2015.
18. Allen P. An economic analysis of the limits of market based reforms in the English NHS. *BMC Health Services Research*. 2013;13 Supplement 1(S1).
19. Bartlett W, Allen P, Perotin V, Turner S, Zamora B, Matchaya G, et al. Provider diversity in the NHS: impact on quality and innovation. Final report. NIHR Service Delivery and Organisation programme, 2011.
20. Dixon J, Beckert, W., Alderwick, H., Thorlby, R., Black, N. 'Hospital mergers increase death and harm'? Not so fast... 2019.
21. DHSC. Integration and Innovation: working together to improve health and social care for all. 2021.
22. NHS England and NHS Improvement. ICS Design Framework. 2021.
23. Charles A, Wenzel L, Kershaw M, Ham C, Walsh N. A year of integrated care systems. London: The King's Fund, 2018.



- 1
- 2
- 3
- 4 24. Pett W. Accelerating transformation: How systems are funding and resourcing 'engine room'
- 5 staff. London: NHs Confederation, 2019.
- 6 25. Pett W. STPs: One year to go? London: NHS Confederation, 2020.
- 7 26. Timmins N. Leading for Integrated Care. London: The King's Fund, 2019.
- 8 27. Lorne C, McDonald R, Walshe K, Coleman A. Regional assemblage and the spatial
- 9 reorganisation of health and care: the case of devolution in Greater Manchester, England. *Sociology*
- 10 *of Health & Illness*. 2019;41(7):1236-50.
- 11 28. Walshe K, Lorne C, Coleman A, McDonald R, Turner A. Devolving health and social care:
- 12 Learning from Greater Manchester. Manchester: The University of Manchester, 2018.
- 13 29. Moran V, Allen P, Sanderson M, McDermott I, Osipovic D. Challenges of maintaining
- 14 accountability in networks of health and care organisations: A study of developing Sustainability and
- 15 Transformation Partnerships in the English National Health Service. *Social Science & Medicine*.
- 16 2020;268.
- 17 30. NHS Providers and NHS Clinical Commissioners. Driving forward system working: a snapshot
- 18 of early progress in collaborative commissioning. London: NHS Confederation and the Foundation
- 19 Trust Network., 2018.
- 20 31. Sanderson M, Allen P, Osipovic D, Petsoulas C, Lau Y, Boiko O, et al. The Developing
- 21 Architecture of System Management: Integrated Care Systems and Sustainability and
- 22 Transformation Partnerships. PRUComm, Forthcoming.
- 23 32. Deakin M. 'Does the buck stop with integrated care systems?'. *Health Service Journal* 2021.
- 24 33. Alderwick H, Gardner T, Mays N. England's new health and care bill. The health secretary
- 25 gains sweeping new powers, with unclear consequences for patients. *BMJ* 2021;374:n1767.
- 26
- 27
- 28
- 29
- 30
- 31
- 32
- 33
- 34
- 35
- 36
- 37
- 38
- 39
- 40
- 41
- 42
- 43
- 44
- 45
- 46
- 47
- 48
- 49
- 50
- 51
- 52
- 53
- 54
- 55
- 56
- 57
- 58
- 59
- 60

## Standards for Reporting Qualitative Research (SRQR)

| No.                       | Topic                                                                                        | Item                                                                                                                                                                                                                                                                                                                                             |
|---------------------------|----------------------------------------------------------------------------------------------|--------------------------------------------------------------------------------------------------------------------------------------------------------------------------------------------------------------------------------------------------------------------------------------------------------------------------------------------------|
| <b>Title and abstract</b> |                                                                                              |                                                                                                                                                                                                                                                                                                                                                  |
| S1                        | Title                                                                                        | Concise description of the nature and topic of the study identifying the study as qualitative or indicating the approach (e.g., ethnography, grounded theory) or data collection methods (e.g., interview, focus group) is recommended                                                                                                           |
| S2                        | Abstract                                                                                     | Summary of key elements of the study using the abstract format of the intended publication; typically includes background, purpose, methods, results, and conclusions                                                                                                                                                                            |
| <b>Introduction</b>       |                                                                                              |                                                                                                                                                                                                                                                                                                                                                  |
| S3                        | Problem formulation                                                                          | Description and significance of the problem/phenomenon studied; review of relevant theory and empirical work; problem statement                                                                                                                                                                                                                  |
| S4                        | Purpose or research question                                                                 | Purpose of the study and specific objectives or questions                                                                                                                                                                                                                                                                                        |
| <b>Methods</b>            |                                                                                              |                                                                                                                                                                                                                                                                                                                                                  |
| S5                        | Qualitative approach and research paradigm                                                   | Qualitative approach (e.g., ethnography, grounded theory, case study, phenomenology, narrative research) and guiding theory if appropriate; identifying the research paradigm (e.g., postpositivist, constructivist/interpretivist) is also recommended; rationale <sup>b</sup>                                                                  |
| S6                        | Researcher characteristics and reflexivity                                                   | Researchers' characteristics that may influence the research, including personal attributes, qualifications/experience, relationship with participants, assumptions, and/or presuppositions; potential or actual interaction between researchers' characteristics and the research questions, approach, methods, results, and/or transferability |
| S7                        | Context                                                                                      | Setting/site and salient contextual factors; rationale <sup>b</sup>                                                                                                                                                                                                                                                                              |
| S8                        | Sampling strategy                                                                            | How and why research participants, documents, or events were selected; criteria for deciding when no further sampling was necessary (e.g., sampling saturation); rationale <sup>b</sup>                                                                                                                                                          |
| S9                        | Ethical issues pertaining to human subjects                                                  | Documentation of approval by an appropriate ethics review board and participant consent, or explanation for lack thereof, other confidentiality and data security issues                                                                                                                                                                         |
| S10                       | Data collection methods                                                                      | Types of data collected; details of data collection procedures including (as appropriate) start and stop dates of data collection and analysis, iterative process, triangulation of sources/methods, and modification of procedures in response to evolving study findings; rationale <sup>b</sup>                                               |
| S11                       | Data collection instruments and technologies                                                 | Description of instruments (e.g., interview guides, questionnaires) and devices (e.g., audio recorders) used for data collection; if/how the instrument(s) changed over the course of the study                                                                                                                                                  |
| S12                       | Units of study                                                                               | Number and relevant characteristics of participants, documents, or events included in the study; level of participation (could be reported in results)                                                                                                                                                                                           |
| S13                       | Data processing                                                                              | Methods for processing data prior to and during analysis, including transcription, data entry, data management and security, verification of data integrity, data coding, and anonymization/deidentification of excerpts                                                                                                                         |
| S14                       | Data analysis                                                                                | Process by which inferences, themes, etc., were identified and developed, including the researchers involved in data analysis; usually references a specific paradigm or approach; rationale <sup>b</sup>                                                                                                                                        |
| S15                       | Techniques to enhance trustworthiness                                                        | Techniques to enhance trustworthiness and credibility of data analysis (e.g., member checking, audit trail, triangulation); rationale <sup>b</sup>                                                                                                                                                                                               |
| <b>Results/findings</b>   |                                                                                              |                                                                                                                                                                                                                                                                                                                                                  |
| S16                       | Synthesis and interpretation                                                                 | Main findings (e.g., interpretations, inferences, and themes); might include development of a theory or model, or integration with prior research or theory                                                                                                                                                                                      |
| S17                       | Links to empirical data                                                                      | Evidence (e.g., quotes, field notes, text excerpts, photographs) to substantiate analytic findings                                                                                                                                                                                                                                               |
| <b>Discussion</b>         |                                                                                              |                                                                                                                                                                                                                                                                                                                                                  |
| S18                       | Integration with prior work, implications, transferability, and contribution(s) to the field | Short summary of main findings; explanation of how findings and conclusions connect to, support, elaborate on, or challenge conclusions of earlier scholarship; discussion of scope of application/generalizability; identification of unique contribution(s) to scholarship in a discipline or field                                            |
| S19                       | Limitations                                                                                  | Trustworthiness and limitations of findings                                                                                                                                                                                                                                                                                                      |
| <b>Other</b>              |                                                                                              |                                                                                                                                                                                                                                                                                                                                                  |
| S20                       | Conflicts of interest                                                                        | Potential sources of influence or perceived influence on study conduct and conclusions; how these were managed                                                                                                                                                                                                                                   |
| S21                       | Funding                                                                                      | Sources of funding and other support; role of funders in data collection, interpretation, and reporting                                                                                                                                                                                                                                          |

<sup>a</sup>The authors created the SRQR by searching the literature to identify guidelines, reporting standards, and critical appraisal criteria for qualitative research; reviewing the reference lists of retrieved sources; and contacting experts to gain feedback. The SRQR aims to improve the transparency of all aspects of qualitative research by providing clear standards for reporting qualitative research.  
<sup>b</sup>The rationale should briefly discuss the justification for choosing that theory, approach, method, or technique rather than other options available, the assumptions and limitations implicit in those choices, and how those choices influence study conclusions and transferability. As appropriate, the rationale for several items might be discussed together.

- 51. Title identifies study as qualitative (title page)
- 52. Abstract adheres to BMJ Open guidelines (Abstract)
- 53/54. Introduction adheres to guidance (p4-8)
- 55. Qualitative approach is described (p9-10. Guiding theory (p6-7)
- 56. Researcher characteristics that would influence the research were not identified.
- 57. Case studies briefly described (p10)
- 58. Selection criteria described (p9).
- 59. Ethics approval detailed (p20)
- 510. Data collection methods described (p9-10)
- 511. Interview topics described (p10)
- 512. Number of participants and characteristics described (Table 1 and 2)
- 513. Analysis described (p10)
- 514. Process of analysis described (p10)
- 515. Process described in methods (p10-11)
- 516/517. Findings are linked to prior research(p18). Quotes throughout findings (p11-17)
- 518/519 Discussion summarises findings and links to earlier scholarship. (p18)Scope of application discussed and limitations (p17-18)
- 520/521 Conflicts of interest and funding acknowledged (p20)

# BMJ Open

## The developing architecture of system management in the English NHS: evidence from a qualitative study of three Integrated Care Systems

|                                 |                                                                                                                                                                                                                                                                                                                                                                                                                                                                                                      |
|---------------------------------|------------------------------------------------------------------------------------------------------------------------------------------------------------------------------------------------------------------------------------------------------------------------------------------------------------------------------------------------------------------------------------------------------------------------------------------------------------------------------------------------------|
| Journal:                        | <i>BMJ Open</i>                                                                                                                                                                                                                                                                                                                                                                                                                                                                                      |
| Manuscript ID                   | bmjopen-2022-065993.R1                                                                                                                                                                                                                                                                                                                                                                                                                                                                               |
| Article Type:                   | Original research                                                                                                                                                                                                                                                                                                                                                                                                                                                                                    |
| Date Submitted by the Author:   | 16-Dec-2022                                                                                                                                                                                                                                                                                                                                                                                                                                                                                          |
| Complete List of Authors:       | Sanderson, Marie; London School of Hygiene and Tropical Medicine Faculty of Public Health and Policy<br>Allen, Pauline; London School of Hygiene and Tropical Medicine Faculty of Public Health and Policy<br>Osipovic, Dorota; London School of Hygiene and Tropical Medicine Faculty of Public Health and Policy<br>Petsoulas, Christina; London School of Hygiene and Tropical Medicine Faculty of Public Health and Policy<br>Boiko, O.; King's College London<br>Lorne, C.; The Open University |
| <b>Primary Subject Heading</b>: | Health policy                                                                                                                                                                                                                                                                                                                                                                                                                                                                                        |
| Secondary Subject Heading:      | Health services research, Qualitative research                                                                                                                                                                                                                                                                                                                                                                                                                                                       |
| Keywords:                       | Health policy < HEALTH SERVICES ADMINISTRATION & MANAGEMENT, Organisation of health services < HEALTH SERVICES ADMINISTRATION & MANAGEMENT, QUALITATIVE RESEARCH, HEALTH SERVICES ADMINISTRATION & MANAGEMENT                                                                                                                                                                                                                                                                                        |
|                                 |                                                                                                                                                                                                                                                                                                                                                                                                                                                                                                      |

SCHOLARONE™  
Manuscripts



I, the Submitting Author has the right to grant and does grant on behalf of all authors of the Work (as defined in the below author licence), an exclusive licence and/or a non-exclusive licence for contributions from authors who are: i) UK Crown employees; ii) where BMJ has agreed a CC-BY licence shall apply, and/or iii) in accordance with the terms applicable for US Federal Government officers or employees acting as part of their official duties; on a worldwide, perpetual, irrevocable, royalty-free basis to BMJ Publishing Group Ltd ("BMJ") its licensees and where the relevant Journal is co-owned by BMJ to the co-owners of the Journal, to publish the Work in this journal and any other BMJ products and to exploit all rights, as set out in our [licence](#).

The Submitting Author accepts and understands that any supply made under these terms is made by BMJ to the Submitting Author unless you are acting as an employee on behalf of your employer or a postgraduate student of an affiliated institution which is paying any applicable article publishing charge ("APC") for Open Access articles. Where the Submitting Author wishes to make the Work available on an Open Access basis (and intends to pay the relevant APC), the terms of reuse of such Open Access shall be governed by a Creative Commons licence – details of these licences and which [Creative Commons](#) licence will apply to this Work are set out in our licence referred to above.

Other than as permitted in any relevant BMJ Author's Self Archiving Policies, I confirm this Work has not been accepted for publication elsewhere, is not being considered for publication elsewhere and does not duplicate material already published. I confirm all authors consent to publication of this Work and authorise the granting of this licence.

1  
2  
3  
4  
5 The developing architecture of system management in the English NHS: evidence from a  
6 qualitative study of three Integrated Care Systems  
7  
8  
9

10 Authors

11 Marie Sanderson ([Marie.Sanderson@lshtm.ac.uk](mailto:Marie.Sanderson@lshtm.ac.uk))

12  
13 Pauline Allen ([Pauline.Allen@lshtm.ac.uk](mailto:Pauline.Allen@lshtm.ac.uk))

14  
15 Dorota Osipovic ([Dorota.Osipovic@lshtm.ac.uk](mailto:Dorota.Osipovic@lshtm.ac.uk))

16  
17 Christina Petsoulas ([Christina.Petsoulas@lshtm.ac.uk](mailto:Christina.Petsoulas@lshtm.ac.uk))

18  
19 Olga Boiko ([olga.boiko1@gmail.com](mailto:olga.boiko1@gmail.com))

20  
21 Colin Lorne ([colin.lorne@open.ac.uk](mailto:colin.lorne@open.ac.uk))  
22  
23  
24  
25  
26  
27  
28  
29

30 Corresponding author: Dr Marie Sanderson, HSRP, LSHTM, 15-17 Tavistock Place, London,  
31 WC1H 9SH, [Marie.Sanderson@lshtm.ac.uk](mailto:Marie.Sanderson@lshtm.ac.uk)  
32  
33  
34  
35

36 Word count: 7359  
37  
38  
39  
40  
41  
42  
43  
44  
45  
46  
47  
48  
49  
50  
51  
52  
53  
54  
55  
56  
57  
58  
59  
60

## Abstract

### **Objective**

Integrated Care Systems (ICSs) mark a change in the English NHS to more collaborative inter-organisational working. We explored how effective the ICS form of collaboration is in achieving its goals by investigating how ICSs were developing, how system partners were balancing organisational and system responsibilities, how partners could be held to account and how local priorities were being reconciled with ICS priorities.

### **Design**

We carried out detailed case studies in three ICSs, each consisting of a system and its partners, using interviews, documentary analysis and meeting observations.

### **Setting/participants**

We conducted 64 in-depth, semi-structured interviews with Director level representatives of ICS partners and observed eight meetings (three in Case Study 1, three in Case Study 2 and two in Case Study 3).

### **Results**

Collaborative working was welcomed by system members. The agreement of local governance arrangements was ongoing and challenging. System members found it difficult to balance system and individual responsibilities, with concerns that system priorities could run counter to organisational interests. Conflicts of interest were seen as inherent, but the benefits of collaborative decision making were perceived to outweigh risks. There were multiple examples of work being carried out across systems and ‘places’ to share resources, change resource allocation and improve partnership working. Some interviewees reported reticence addressing difficult issues collaboratively, and that organisations’ statutory accountabilities were allowing a ‘retreat’ from the confrontation of difficult issues facing systems, such as agreeing action to achieve financial sustainability.

### **Conclusions**

There remain significant challenges regarding agreeing governance, accountability and decision making arrangements which are particularly important due to the recent Health and Care Act 2022 which gave ICSs allocative functions for the majority of health resources for

1  
2  
3 local populations. An arbiter who is independent of the ICS may be required to resolve disputes,  
4 along with increased support for shaping governance arrangements.  
5  
6  
7  
8  
9

## 10 **Article summary**

### 11 **Strengths and limitations of this study**

- 12
- 13
- 14
- 15 • This is a qualitative study of the development of Integrated Care Systems in the
- 16 English NHS between 2019 and 2021
- 17
- 18 • The three in-depth case studies of Integrated Care Systems include 64 in-depth, semi-
- 19 structured interviews, observation of eight system level meetings and documentary
- 20 analysis
- 21
- 22 • The case studies may not be representative of all national developments
- 23
- 24 • Phase 1 of the fieldwork was cut short due to the COVID-19 pandemic which may
- 25 have reduced the nuance of findings
- 26
- 27
- 28
- 29

30 Keywords: NHS, integration, collaboration, governance, inter-organisational  
31  
32  
33  
34  
35  
36  
37  
38  
39  
40  
41  
42  
43  
44  
45  
46  
47  
48  
49  
50  
51  
52  
53  
54  
55  
56  
57  
58  
59  
60

The developing architecture of system management in the English NHS: evidence from a qualitative study of three Integrated Care Systems

Sanderson, M., Allen, P., Osipovic, D., Petsoulas, C., Boiko, O., Lorne, C.

## POLICY BACKGROUND

Integrated Care Systems (ICSs) are a policy initiative in the English NHS (NHS, hereafter) whereby local ‘systems’ of providers and commissioners of NHS services, together with local authorities and other local partners (such as voluntary and community sector organisations) collectively plan health and care services for local populations. The approach is expected to achieve improved outcomes in population health and healthcare, reductions in inequalities in outcomes, experience and access, and enhanced productivity and value for money, in addition to helping the NHS to support wider social and economic development (1). In stark contrast with the growing salience of ICSs, there is a paucity of empirical research concerning collaborative decision making in ICSs in practice. It is particularly important to examine the ICS model now given the recent Health and Care Act (HCA 2022) which put ICSs on a statutory footing from July 2022, and gave them allocative functions for the majority of health resources for local populations. This paper reports a recent study examining how ICSs were developing in the period prior to HCA 2022 and how effective the ICS form of collaboration is as a means to achieve its goals.

In order to understand the ICS model, it is necessary to first clarify ICS policy and situate ICSs within the wider context of the NHS. Alongside the use of market mechanisms to promote competition in the NHS since the 1990s, there has been an ongoing reliance on collaboration, with a long history of the development of collaborative approaches to jointly plan and deliver health, social care and public health services alongside other services (2). Collaboration has always been an important behaviour in the English NHS, as illustrated by many empirical studies which describe the persistence of collaborative behaviour amongst commissioners and providers of NHS services since the establishment of the internal market (3-6). However, while co-operation was always a feature of NHS policy and legislation, the development of ICSs has accompanied a fundamental shift away from the architecture of the internal NHS market to foreground collaboration as the dominant mode of co-ordination. NHS policy now describes competition as ‘*transactional bureaucracy*’ standing in the way of ‘*sensible decision making*’ (7) and the recent legislative changes have formally removed competition as a co-ordinating force in the NHS.



1  
2  
3 With publication of *The Five Year Forward View* (8), which laid out a vision to improve care  
4 delivery through breaking down barriers between different organisations and care sectors,  
5 ‘integration’ became a formal policy objective.<sup>1</sup> This led to policy initiatives which focused on  
6 improving the co-ordination of service provision across organisational boundaries such as the  
7 Vanguard New Care Models programme and the Integrated Care and Support Pioneers  
8 exemplars (9-11). Alongside these developments, Sustainability and Transformation Plans  
9 were first introduced in 2015 as NHS organisations and local authorities (which are responsible  
10 for social care provision) were asked to work together to develop services for their local  
11 population (12). Sustainability and Transformation Partnerships (STPs) and ICSs (a more  
12 ‘mature’ form of STPs) were introduced from 2016<sup>2</sup> as ‘bottom-up’ partnership arrangements,  
13 bringing together local organisations to deliver the ‘triple integration’ of primary and specialist  
14 care, physical and mental health services, and health with social care (13).  
15  
16  
17  
18  
19  
20  
21  
22  
23  
24  
25

26 The core tenet underlying ICSs is that the health and care needs of local populations will be  
27 best met if organisations planning and providing health and care services to that population  
28 agree collective strategies for resource utilisation. The 42 ICSs across England follow a three-  
29 tier geographically-defined model (systems, places and neighbourhoods) in which  
30 collaboration at each scale addresses different aims. ‘Systems’ (population size of 1-3 million  
31 covering the whole ICS footprint), collective decision making focuses on strategic change, the  
32 development of governance and accountability arrangements, the management of performance  
33 and collective resources and identification and sharing of best practice. ‘Places’ within systems  
34 (population size of 250,000 – 500,000 and organised typically at borough/local authority level)  
35 are expected to focus on service integration, the development of anticipatory care, out of  
36 hospital care and hospital discharge. ‘Neighbourhoods’ (population size of 35,000-50,000 and  
37 based around non-statutory Primary Care Networks (PCNs) of groups of GP practices) are  
38 expected to improve integration of primary health services with community health care services  
39 and other local health and care organisations. In practice systems (and ‘places’ and  
40 ‘neighbourhoods’) vary considerably in terms of population size and organisational  
41  
42  
43  
44  
45  
46  
47  
48  
49  
50  
51  
52  
53

---

54  
55 <sup>1</sup> There is no single definition of integration, and the term is used to encapsulate a variety of types of co-  
56 operation including integration at service, organisational or clinical level, at macro level (across a population),  
57 meso level( for a particular patient group) and at micro level (for individual patient)

58  
59 <sup>2</sup> STPs were in existence until April 2021 when the last remaining STPs in England gained ICS status. For reasons  
60 of clarity, this paper will use the term ICS only.

1  
2  
3 complexity, reflecting local factors such as demography and existing networks of collaboration,  
4 and may elude neat containment within coherent territorial geographies (14).  
5  
6  
7  
8

9 It is particularly important to examine how ICSs are developing as the 'system' has become  
10 the central mechanism through which the achievement of NHS goals is co-ordinated. Systems  
11 are expected to develop co-ordinated plans for NHS activity, workforce and money. The  
12 approach taken by the NHS economic and structural regulator - NHS England and  
13 Improvement (NHSEI) - is tailored to give primacy to the system in financial and performance  
14 matters, alongside NHS organisations' individual accountabilities (which remain unaffected)  
15 (15). Additionally, financial rewards are being linked to system rather than individual  
16 organisation performance, such as linking the attainment of system financial targets to financial  
17 rewards for individual NHS organisations (16).  
18  
19  
20  
21  
22  
23  
24  
25  
26

27 ICSs have recently become even more significant bodies. The recent HCA 2022 put ICSs on a  
28 statutory footing from July 2022, consisting of a dual structure of a statutory body, the  
29 Integrated Care Board (ICB) (focused on integration within the NHS and accountable for NHS  
30 resources), and a statutory committee, the Integrated Care Partnership (ICP) (focused on  
31 integration between NHS, local government and wider partners). Clinical Commissioning  
32 Groups (the current commissioning bodies) were abolished with the transfer of allocative  
33 functions to the ICBs. Consequently ICBs now have responsibility for commissioning acute,  
34 community and mental health NHS services for their population, primary medical care, with  
35 possible further delegations from NHSE including other primary care budgets.  
36  
37  
38  
39  
40  
41  
42  
43  
44

45 It is important to understand collaboration within the wider institutional context.. Of particular  
46 importance in relation to ICS policy is the permissive nature of governance arrangements and  
47 organisational sovereignty. ICSs have considerable freedom to decide their own local  
48 governance arrangements rather than following a prescribed national blueprint. At the time of  
49 the research each ICS could tailor governance arrangements to suit local circumstances, within  
50 minimum governance requirements for a 'Partnership Board' which provides a forum for  
51 collective action on issues that affect all system members (13), and this minimal and permissive  
52 approach remains the case under the HCA 2022. The permissive nature of local governance  
53 has significant implications when coupled with the principle of subsidiarity (where decisions  
54  
55  
56  
57  
58  
59  
60

1  
2  
3 are taken closest to those affected). This is particularly so in light of HCA 2022 which carries  
4 the expectation that statutory ICBs will delegate substantial decision-making regarding the  
5 allocation of resources to committees and sub-committees, such as ‘place-based committees’  
6 and provider collaboratives (non-statutory partnership arrangements involving two or more  
7 trusts) (17, 18), for which there are no national governance requirements. It is therefore  
8 important to understand how ICSs are addressing the challenge of agreeing local governance  
9 arrangements while addressing the principle of subsidiarity.

10  
11  
12 A second important aspect of ICS collaboration relates to organisational sovereignty.  
13 Collaboration necessarily remains a voluntary, consensual, non-binding model of co-ordination  
14 (although effectively mandated by NHS policy for NHS organisations), and providers remain  
15 separate organisations with their own organisational interests, and accountabilities, and  
16 freedom to dissent. All system partners have their own accountabilities and statutory  
17 responsibilities which they must hold in regard when agreeing collective system plans. For  
18 example NHS Trusts and Foundation Trusts (FTs) have legal duties to provide safe care and  
19 treatment (HSCA 2008) and FT boards have a duty to act with a view to promoting the success  
20 of the Trust to maximise the benefits for the members of the Trust as a whole and for the public  
21 (HSCA 2012). NHS Trusts and FTs have direct accountability to NHS England for their  
22 performance. System partners from outside the NHS, such as local government or independent  
23 sector organisations, are subject to separate institutional contexts regarding priorities, ways of  
24 working and financial rules.

25  
26  
27 Thirdly, ICSs exist in a complex landscape of pre-existing partnerships and planning networks  
28 which must be accounted for, such as Health and Wellbeing Boards (formal committees of  
29 Local Authorities, which have a statutory duty, with CCGs, to produce joint strategic needs  
30 assessments and joint health and wellbeing strategies for their local population).

31  
32  
33 These complexities raise questions about how collaborative decision making in ICSs will work  
34 in practice, including the extent to which organisational sovereignty disrupts the ability of  
35 systems to achieve consensus. Now that the HCA 2022 has come into force, ICSs have  
36 significant allocative responsibilities, and are subject to associated expectations of improved  
37 outcomes etc (1). To make headway with this agenda, ICSs will need to agree suitable local  
38 governance arrangements to discharge their functions according to the principle of subsidiarity,  
39 and make challenging collective decisions, which may be perceived as disadvantaging individual  
40 members. It is important to examine how these issues have been experienced and addressed in ICSs

1  
2  
3 to date. A small number of empirical studies have been published which are concerned with the  
4 development of collaborative arrangements within ICSs (19-24), and the development of  
5 commissioning in the light of system collaboration (25, 26). The study reported in this paper  
6 makes a significant contribution to this empirical evidence by providing a nuanced analysis of  
7 the development of governance, accountability and decision making arrangements in three  
8 ICSs.  
9

10  
11  
12  
13  
14 ICS policy does not explicitly draw on theory to explain how the use of collaborative decision-  
15 making processes will lead to the attainment of ICS aims such as enhancing productivity and  
16 value for money. There are various frames which can be used to understand the development  
17 of collective action in ICSs, including those focusing on network and collaborative governance  
18 from political science and public administration perspectives (27, 28). We have chosen to focus  
19 on the work of Ostrom (29, 30), rooted in economic theories of co-operation, which suggests  
20 that, contrary to the received wisdom of ‘the tragedy of the commons’, communities can co-  
21 operate to self-manage limited shared (‘common pool’) resources in a way that benefits all  
22 community members and leads to the sustainability of the resource. Ostrom originally  
23 conceptualised common pools as limited natural or man-made resource systems on which  
24 multiple parties depend. However there is resonance with the utilisation of financial resources  
25 to provide health services, as an inherently collective task where organisations may be driven  
26 to work together to make best use of limited facilities and expertise. The development and  
27 functioning of system working in the English NHS, where members are asked to put aside self-  
28 interest and agree collective strategies for resource utilisation to achieve financial sustainability  
29 at a system level, has been analysed previously in relation to Ostrom’s theories, including the  
30 degree of fit between the NHS institutional context and Ostrom’s notion of behaviour in  
31 relation to common pool resources (31, 32).  
32  
33  
34  
35  
36  
37  
38  
39  
40  
41  
42  
43  
44  
45  
46

47 Part of Ostrom’s work was the development of design principles which describe the  
48 environment in which communities can co-operate to self-manage limited shared resources.  
49 Central principles include the need for communities to set up clear boundaries and membership,  
50 agree for themselves rules regarding how resources will be used, and agree the process for  
51 monitoring of behaviour and sanctions (29).  
52  
53  
54  
55  
56  
57

## 58 **STUDY QUESTIONS**

59  
60

1  
2  
3 Our research questions were based on our understanding of ICS policy, and the literature  
4 regarding economic theories of co-operation, in particular the work of Ostrom (30). The  
5 questions focus on three broad areas: firstly, how decisions are being made in ICSs; secondly,  
6 how ICS partners are balancing collective and individual interests; and thirdly, what kind of  
7 decisions systems are making regarding the allocation of resources.  
8  
9

10  
11  
12 In relation to the first area, how decisions are being made in ICSs, we wanted to establish: how  
13 the local leadership and cooperative arrangements with stakeholders (statutory, independent  
14 and community-based, including local authorities) were governed in light of policy  
15 recommendations. Secondly, in terms of the balancing of collective and individual interests,  
16 the study addressed: how individual organisations are reconciling their role in an ICS with their  
17 individual roles, accountabilities and statutory responsibilities. Thirdly, we wanted to establish  
18 what decisions regarding the allocation of resources are being made through ICSs, in particular  
19 whether ICSs are able to allocate resources more efficiently across sectoral boundaries and  
20 bring their local health economies into financial balance.  
21  
22

23  
24  
25 Our research was divided into two phases. The first phase focused on the system scale. In the  
26 second phase of our research we addressed similar questions while focusing on the  
27 development of 'place-based partnerships', and the developing role of the regional NHSEI  
28 function (regional teams which are responsible for the quality, financial and operational  
29 performance of all NHS organisations in their area).  
30  
31

## 32 **STUDY DESIGN**

33  
34 The study used qualitative methods with an additional quantitative component. The results of  
35 the quantitative analysis are included in our final report (33). Primarily, we used a case study  
36 research design, consisting of three in-depth case studies, each consisting of a system and its  
37 partners. The use of case studies was thought to be the most appropriate research design for  
38 this study as interviews and documentary analysis were informed by the contextual information  
39 we were able to gather by concentrating on three specific systems. An initial literature review  
40 of NHS systems governance (34) was drawn on to inform strategy when selecting case study  
41 sites. This literature review led to the identification of various characteristics of interest in  
42 local contexts which might be important in relation to how system working developed. These  
43 included: the number and variety of providers of NHS services in the system; the number of  
44 local authorities within systems; and the degree of fit between health and local authority  
45 boundaries. We shortlisted systems which had one or more of the following characteristics:  
46  
47  
48  
49  
50  
51  
52  
53  
54  
55  
56  
57  
58  
59  
60

system boundaries which did not correspond to local authority boundaries; the presence of private sector and/or social enterprise partners; a concentration of providers; a concentration of local authorities. From our shortlist, we sought to recruit case study sites which demonstrated variance across these characteristics. Additionally, as we were also interested in the role of the regional NHSEI function, we sought to select case study sites from differing NHSEI regions. In Phase 2 of the research a single ‘place’ within our three case studies was identified based on characteristics of interest emerging from the Phase 1.

The first phase of fieldwork was undertaken between December 2019 and March 2020 and focused on studying ICSs (and their predecessor STPs). Fieldwork was interrupted in March 2020 by the COVID-19 pandemic. In particular we had fewer interviewees in CS1 than intended. The second phase of fieldwork took place between January 2021 and September 2021 and focused on a more detailed examination of a selected ‘place’ within each of our case studies. All interviews in the second phase of the fieldwork were conducted over an online platform rather than face to face. We conducted a total of 64 in-depth, semi-structured interviews (see Tables 1 and 2) and observed eight system level meetings (three in CS1, three in CS2 and two in CS3). Interviewees were recruited due to their role as senior management representatives of system partners who participated in the main decision-making forums at system scale, and within the selected ‘place’. All participants gave informed consent. Topic guides related to the study questions described above. The purpose of observing a variety of meetings was to supplement the information we obtained from interviews. In addition, we gathered documentation from all three case study sites which included strategic plans, meeting papers and details of governance structures. These sources were used to add detail to the interview accounts.

*Table 1: Phase 1 interviews by case study site and organisational type*

| Organisation      | Case Study 1 | Case Study 2 | Case Study 3 | Total interviews |
|-------------------|--------------|--------------|--------------|------------------|
| ICS leadership    | 2            | 4            | 2            | 8                |
| CCG               | 0            | 1            | 1            | 2                |
| NHS Providers     | 3            | 3            | 4            | 10               |
| Local Authorities | 1            | 1            | 4            | 6                |
| Primary Care      | 0            | 0            | 0            | 0                |
| Other Providers   | 0            | 2            | 0            | 2                |
| Total interviews  | 6            | 11           | 11           | 28               |

*Table 2: Phase 2 interviewees by case study site and organisational type*

| Organisation    | Case Study 1 | Case Study 2 | Case Study 3 | Total interviewees |
|-----------------|--------------|--------------|--------------|--------------------|
| ICS leadership* | 2            | 2            | 3            | 7                  |

|                  |    |    |    |    |
|------------------|----|----|----|----|
| Regional NHSEI   | 1  | 1  | 1  | 3  |
| CCG              | 3  |    | 5  | 8  |
| NHS Providers    | 2  | 2  | 3  | 7  |
| Local Government | 1  | 2  | 3  | 6  |
| Primary Care     | 1  | 1  | 1  | 3  |
| Other Providers  |    | 1  |    | 1  |
| Other            |    | 1  |    | 1  |
| Total interviews | 10 | 10 | 16 | 36 |

\*Where an interviewee held a joint ICS/CCG role, this is recorded as an ICS leadership interviewee

The three case study sites (which consisted of one ICS and two STPs at the time of recruitment) are located in different parts of England. CS1 covers an urban population, has complicated boundaries and includes 5 unitary authorities. It gained ICS status in 2021. CS2 system shares near coterminosity with the county council, and system partners include social enterprises, and gained ICS status in one of the earliest waves. CS3 system has a large geographical footprint, and a complex, multi-layered governance structure spanning seven CCGs (merging to a single CCG in 2021) and eight Local Authorities. It became an ICS in 2020. The change in status from STP to ICS in CS1 and CS3 during the fieldwork did not impact our data collection as system members, leaders and the ongoing work of the system remained unaltered.

PA, MS, DO and CL agreed the theoretical framework, and the main themes derived from the research questions. MS, DO and CP agreed additional themes emerging from the data. The initial themes for our analysis included: partners' definition of the system and membership; the structure of governance arrangements; perceptions of developing accountabilities; developing spatial scales and functions; system resource allocation; relationships; drivers of co-operation; use of competition; devolution and space to act. The analysis of Phase 2 data drew on the same themes, with the addition of a theme concerned with the future development of system working. The interviews were transcribed, and coded (by MS, DO, OB, CL and CP) using the agreed coding framework. The principal researchers (MS, DO and CP) met periodically to check whether the coding framework was working well, to discuss emerging findings, and check researchers' interpretation of the data and areas of difference between the case studies and to agree to any necessary modifications to the coding framework.

### **Patient and Public Involvement**

No patients or public were involved in this study.

### **RESULTS**

Our findings are grouped into three sections, each relating to a significant aspect of ICS decision-making. Firstly, the development of decision-making arrangements in ICSs, secondly

1  
2  
3 how organisations are reconciling systems and individual roles, and thirdly the kind of  
4 decisions ICSs are making regarding the allocation of resources.  
5  
6

### 7 **Development of decision-making arrangements**

8

9  
10 System partners were generally enthusiastic about the value of increased collaboration, seeing  
11 this as the best way to achieve better use of resources and health improvement across health  
12 and social care. The views of local authorities were mixed, viewing system development as  
13 both an opportunity and with a dose of scepticism. They were keen to be involved in  
14 arrangements as an equal partner, and not the *'last thing that you come to'* in a health focused  
15 system (Local Authority Director 4, CS3). Other non-NHS partners (social enterprises in CS2)  
16 also viewed ICSs with scepticism, for example the emphasis on achieving financial balance in  
17 the NHS was seen by some as illustrating the NHS-centric focus.  
18  
19  
20  
21  
22  
23

24  
25 The refinement of governance arrangements was an ongoing task for local partners. Part of this  
26 task was agreeing the spatial configurations of systems and 'places'. We found that agreement  
27 between health and local government of the 'best' spatial configurations were of particular  
28 importance to ensuring clarity of governance arrangements. In two of our case studies (CS1  
29 and CS2) local partners appeared to be in agreement regarding the most sensible system and  
30 'place' configurations. In CS3 however, where the system spanned seven CCGs (merging to a  
31 single CCG in 2021) and eight Local Authorities, trying to reach consensus among partners  
32 about 'place' configuration was a lengthy process, making it difficult to progress integration, a  
33 process described as *'building the aeroplane while flying it at multiple levels'*. (NHS Trust  
34 Director, Borough-based partnership 1, CS3). In CS3, local government configurations were  
35 perceived to be a particularly awkward fit at the system level due to the sheer volume of  
36 organisations involved. Local actors deviated from the system/place division in favour of a  
37 'double-layer' set up, exemplified by the presence of an intermediate subsystem level which  
38 lay between the lower tier place partnerships (corresponding with local authority boundaries)  
39 and the ICS, described by one interviewee as *"systems within systems within systems"* (Local  
40 Authority Director 1, CS3). This arrangement was thought to reflect more accurately local  
41 configurations, but was also acknowledged, due in part to the lack of uniformity, to remain  
42 complex, risking confusion and lack of clarity. In this case study, the role and membership of  
43 governance forums were differently understood and described, and the future shape of  
44 governance arrangements was contested.  
45  
46  
47  
48  
49  
50  
51  
52  
53  
54  
55  
56  
57  
58  
59  
60



1  
2  
3 Beyond the local agreement of spatial configurations, system partners were finding agreeing  
4 local governance arrangements inherently challenging. This was seen to reflect both the scale  
5 of the system agenda and the already complex institutional landscape in which ICSs were  
6 situated:  
7  
8  
9

10 *'Achieving clarity over where you make decisions, who makes decisions, and then who*  
11 *enacts them is really difficult, and you often only find out you've got it wrong by doing*  
12 *it...this is bottom up, and it's to take into account statutory body decision making, trying*  
13 *to make use of architecture that was already there, and then linking it all together. And*  
14 *every time we do it, we find other bits that we then add in, because it's just reflective of*  
15 *the size of the remit of an ICS'* (ICS Director 1, CS2)  
16  
17  
18  
19  
20  
21

22 The drive to establish partnership working at the lowest possible level, in line with the principle  
23 of subsidiarity, was hampered by a lack of clarity both from national policy and locally on how  
24 to distribute power, resources and responsibilities between different levels of governance.  
25 Local actors in all three case studies found it challenging to decide which decisions and  
26 functions should sit where. In particular in CS3 the agreement of such arrangements were  
27 further hampered by the lack of consensus regarding the configuration of 'places', reflecting  
28 the existence of two non-aligned spatial configurations at 'place scale'. In all the case studies,  
29 going through these arrangements locally on a case-by-case basis was a time consuming and  
30 complex process, which was particularly difficult given the shifting sands of policy, the  
31 prioritisation of the COVID-19 response and, in some instances, the existence of power  
32 dynamics regarding who the decision makers were.  
33  
34  
35  
36  
37  
38  
39  
40

41 Increasingly, formal governance arrangements were being developed which included an  
42 emerging focus on the prioritisation of 'place' collective voice over representation of individual  
43 organisations. All of our case studies were considering the adoption of a formal partnership  
44 arrangements in 'places', such as an Alliance agreement, although only one (CS2) had adopted  
45 a formal Alliance agreement. There was some frustration regarding the effort expended on the  
46 establishment and refinement of governance and the perceived added value of this activity. As  
47 the lead of a place-based partnership observed, informal relationships between partners were  
48 more important to the achievement of collaboration than formal governance arrangements:  
49  
50  
51  
52  
53  
54  
55

56 *'I think you can easily really get quite led astray on the governance. You can easily*  
57 *spend years and years doing the governance. But I think in reality it's very difficult in*  
58 *governance terms and in NHS contracting terms to force an organisation to do*  
59  
60

1  
2  
3 *something they don't want to do, and actually in all my years, and I've got many years,*  
4 *actually, in reality I've hardly ever voted on a board, hardly ever had to have a count*  
5 *up of those, and I've hardly ever gone through any sort of legal proceedings on NHS*  
6 *contracts' (Place Director, CS 2)*  
7  
8  
9

10 Others experienced governance architecture as significant. For example, smaller partners such  
11 as GPs, and those who were not often previously invited to the table, such as District Councils,  
12 welcomed the formal structures which allowed them an equal voice in discussions.  
13  
14  
15

### 16 **Reconciliation of system and individual responsibilities**

17  
18  
19 The reconciliation of system and individual responsibilities was reported similarly across the  
20 three case studies. This reconciliation was aided by an ongoing shift from competition to  
21 collaborative working, and a changing environment regarding commissioning mechanisms,  
22 pricing structures and financial incentives. In the second phase of the research, the changing  
23 financial regime in response to COVID-19 was reported to have '*completely rewritten the*  
24 *rulebook*' (ICS Director 2, CS2), moving to block contract payments 'on account' for all NHS  
25 providers, with suspension of the Payment By Results (PBR) national tariff.<sup>3</sup> In all case studies,  
26 formal tendering or competitive processes were no longer anticipated to be a commonly used  
27 commissioning mechanism.  
28  
29  
30  
31  
32  
33

34  
35 While incentives for competition among providers had subsided, organisations were still  
36 finding it challenging to balance system and individual responsibilities. Among NHS partners  
37 there was scepticism about the effectiveness of financial incentives to encourage NHS  
38 organisations to favour a system perspective. In the first phase of our research the notion of  
39 achieving financial balance within systems was widely viewed as unrealistic, unattainable, and  
40 unsupported by the wider regulatory context. More detailed objections were that individual  
41 control total allocations did not consider local circumstances and imposed stringent efficiency  
42 targets on already struggling and historically underfunded providers. Agreeing projections of  
43 performance against control totals was described as a process of negotiation with NHSEI. In  
44 the second phase, interviewees were concerned that while the Elective Recovery Fund  
45 (additional funding for clearing the elective backlog created by COVID-19) was encouraging  
46 organisations to make plans together, it was not a sufficient mechanism to stop individual  
47 organisations giving priority to their organisational interests and patients. One Acute Trust  
48  
49  
50  
51  
52  
53  
54  
55  
56  
57  
58

---

59 <sup>3</sup> PBR is a prospective payment system, associated with incentives for competition, in which each episode of  
60 care is charged at national tariff rates

1  
2  
3 Director saw a clear tension between ‘the glib [regional NHSE/I] vision that we’ve all suddenly  
4 switched to managing waiting lists as a sector’ and what they saw as the duty of NHS Trusts  
5 to prioritise their own patients:  
6  
7

8  
9 *‘There’s a huge variation in the scale and nature of the problem in the different*  
10 *organisations, and we at [hospital] hold most of the problem on elective recovery in*  
11 *terms of the long waits. And if everybody were to suddenly use all their capacity then,*  
12 *for the good of the system, some organisations wouldn’t do any operating on their own*  
13 *patients for a very long time, they would spend a long time operating on our patients*  
14 *and not much else. And that’s not really a proposition that you can put to the statutory*  
15 *body and expect it to accept that, so while we’re making incremental steps in that*  
16 *direction, they know that’s not feasible’.* (Director, Acute Trust, CS3)  
17  
18  
19  
20  
21  
22

23 Provider concerns that system priorities could run counter to organisational interests were  
24 prevalent. On the one hand, some interviewees were quite sanguine about the prospect of  
25 dropping some of their organisational priorities in favour of shared priorities, if this led to an  
26 improvement of services in the locality. For example, an Acute Trust Director suggested that  
27 the Trust would be prepared to spend extra money on areas of need, such as housing, and other  
28 services rather than spending it on their own hospital. Others, however, reflected on the  
29 potential risks of collective decision making in the light of individual organisation’s statutory  
30 responsibility to ensure that risks to the organisation and the public were mitigated effectively.  
31 One Acute Trust CEO summarised it thus:  
32  
33  
34  
35  
36  
37  
38

39 *‘So then you get into a conversation, well, maybe there’s horse trading to be done in*  
40 *the system, which is I expect what the centre thinks, they think, well, they will just have*  
41 *to agree across the system to cut their cloth if you like...X Hospital needs a new roof*  
42 *which is more important than my theatres because the rain gets in on the patients...I*  
43 *mean, if a woman in my organisation dies of some hideous infection after she’s had her*  
44 *section, I wonder who’s going to be in the coroner’s court explaining why we let her be*  
45 *operated on in an operating theatre that I knew wasn’t meeting the standard. It’s really*  
46 *tricky, isn’t it?’* (Director, Acute NHS FT, CS2)  
47  
48  
49  
50  
51  
52  
53  
54  
55  
56  
57

58 A further perspective on balancing system and individual priorities was provided by local  
59 authority and the independent sector interviewees in CS2. From the local authority perspective,  
60

1  
2  
3 the wider institutional context was not conducive to system working due to differences in  
4 business and planning cycles between health and local government, the wider remit of local  
5 councils (of which social care was only a part) and differing approaches to procurement. Where  
6 system or 'place' boundaries were not aligned with local authority footprints such as in two-  
7 tier 'place' configuration in CS3, local authorities were more reluctant to engage in strategic  
8 commissioning and planning discussions. Local authority interviewees in all case studies were  
9 also concerned about their potential exposure to financial risk, and loss of control over limited  
10 council resources. Interviewees from the two social enterprises in CS2 suggested that balancing  
11 individual and system roles was very difficult for independent sector organisations, who had  
12 obligations to break even and sat outside the supportive policy context of the NHS.  
13  
14  
15  
16  
17  
18  
19  
20  
21

22 System partners in all case studies acknowledged that, as system commissioning  
23 responsibilities evolved, conflicts of interest were inherent in this partnership mode of decision  
24 making, but believed that the benefits of collaborative decision making outweighed the risks  
25 of conflicting interests. In terms of overcoming conflicts of interest, it was thought that  
26 conventional methods of addressing conflicts, most commonly by removing the conflicted  
27 party from the decision-making process, were insufficient as everyone was an interested party  
28 with a potential conflict. It was hoped that the close collaborative environment and peer  
29 monitoring would guard against abuses of influence, and that the consensus model of decision  
30 making would allow objections to be voiced.  
31  
32  
33  
34  
35  
36  
37

38 Accountability is a central concept when examining the potential of ICSs to achieve their goals,  
39 both vertical (and formal) accountability (holding to account of the system, system leaders and  
40 (NHS) system partners for system performance by NHSEI), but also informal and horizontal  
41 accountability (the holding to account of system partners by the system). ICSs also have an  
42 informal accountability relationship with the public which should be considered alongside  
43 system partners' own accountabilities to the public. Horizontal accountability between system  
44 partners was reported across our case studies to be weak, characterised by 'softer' mechanisms  
45 of holding to account through trust, rather than in a formal or codified way. This developing  
46 assurance function concerned open information exchange about organisational performance,  
47 quality and finance which could facilitate open discussion and serve as an incentive to improve.  
48  
49  
50  
51  
52  
53  
54  
55  
56

57 An understanding of the needs of local patients and communities underlies the aims of systems,  
58 particularly those around population health and the development of local partnerships. The case  
59  
60

study systems were developing routes to public engagement of various kinds and at varying spatial scales, seeking to understand the priorities, needs and preferences of the population. Each had established citizens' panels with varied aims, such as in CS1 to start a public debate about allocation of limited resources. Other routes to engagement included research to understand residents' opinions and activities in conjunction with Healthwatch. At the time of the fieldwork ICSs had no formal accountability to the public. Formal accountability was understood to lie with, and largely be performed through, the partners that held a legal duty to involve the public. It was acknowledged this meant the visibility to the public of the ongoing work of the collaborative partnerships and hence public accountability remained low.

### Decisions regarding resource allocation being made by systems

Our research was conducted during the early days of system working, and due to the disruption caused by the COVID-19 pandemic, it is difficult to assess the extent to which ICSs are achieving their aims concerning the allocation of resources more efficiently and financial balance within the system. We gathered multiple examples of work being carried out across systems and 'places' to share resources, change resource allocation and improve partnership working (see Table 3 below for examples of work at place scale). However local actors acknowledged that the impact of these initiatives in terms of efficiencies and quality markers is difficult to quantify.

Table 3: Examples of work being carried out at place scale

| Case Study | Examples of partnership working in 'places'                                                                                                                                                                                                                                                                                                                                                                                                                                                                                                                                                      |
|------------|--------------------------------------------------------------------------------------------------------------------------------------------------------------------------------------------------------------------------------------------------------------------------------------------------------------------------------------------------------------------------------------------------------------------------------------------------------------------------------------------------------------------------------------------------------------------------------------------------|
| CS1        | Development of data driven approach to care <ul style="list-style-type: none"> <li>• Establishment of population health unit across local authority and acute trust</li> <li>• Data sharing across primary and secondary care</li> </ul> Appointment of Health Aging Co-ordinators across social, primary and secondary care<br>Development of system-wide pathways, such as end of life care strategy                                                                                                                                                                                           |
| CS2        | Resolution of operational performance issues, including day to day capacity management<br>Work with wider partners to situate services outside hospital, including development of new premises<br>Development of key worker affordable housing on hospital site<br>Development of opportunities for shared service delivery, such as urgent treatment centre<br>Decisions regarding the distribution of non-recurrent funding<br>Development of 'integrated delivery units' such as discharge team with jointly funded lead<br>Pilot for 'step-down' nursing provision to aid hospital discharge |
| CS3        | At intermediate subsystem tier:<br><br>Sharing best practice across boroughs<br>Performance management and assurance<br>Resource allocation<br>Operational command for COVID-19                                                                                                                                                                                                                                                                                                                                                                                                                  |

|  |                                                                                                                                                                                                                                                                                                                                        |
|--|----------------------------------------------------------------------------------------------------------------------------------------------------------------------------------------------------------------------------------------------------------------------------------------------------------------------------------------|
|  | In borough-based partnerships:<br>Development of 'multi-disciplinary discharge hubs'<br>Pathway development for interface between hospital and wider system<br>Operational collaboration during COVID-19 response<br>Development of shared workforce strategy<br>Decisions regarding the distribution of, COVID-19 contingency funding |
|--|----------------------------------------------------------------------------------------------------------------------------------------------------------------------------------------------------------------------------------------------------------------------------------------------------------------------------------------|

At system scale agreements had been reached to share resources in order to take advantage of economies of scale, and offer mutual support. A common focus was sharing staff (both managerial and clinical) between providers with a view to helping to improve performance, sharing best practice and expertise, joint staff bank, a virtual academy. CS2 appeared most proactive in sharing resources at system and place level, and this had in part been enabled by considerable transformation monies associated with early ICS status which had been used to pilot changes to care design and delivery. In all case studies further sharing of resources was necessitated by the pandemic, where partners made collective decisions about allocating funds and risk-sharing in the course of the pandemic response. It was recognized, however, that the real test about sharing of resources would come in the future, when decisions about priorities would need to be taken in normal conditions rather than either in the middle of a pandemic or accompanied by significant additional funds.

As described in the section above, the financial regime changed greatly during the period of the research, moving towards the facilitation of collaborative behaviour. While these changes in payment mechanisms were seen as helpful facilitators, collaboration around the collective use of resources was not plain sailing. Other forms of competition between providers remained, for example competition for allocation of resources or competitive pressures in distribution of services, access to workforce, capital and investment.

Overall, the changing financial regime did not appear sufficient to allow systems to address long standing issues. While systems were engaged in negotiating actions to achieve long term financial sustainability, for example to spend more in primary/community services, increase digital interventions, reduce duplication of functions across organisations, and limit ineffective procedures, this had not yet translated into specific agreements in practice. In CS2, forthcoming work to decide functions to be shared across acute hospitals, and reduce face to face outpatient appointments, was expected to be a '*really difficult and painful*' process (ICS Director 3, CS2).

Some interviewees reported there was reticence addressing such difficult issues, such as the need to reconfigure services across sites to make savings, in ICS forums due to the decision-

1  
2  
3 making model. The CS2 ICS Accountable Officer suggested organisations' statutory  
4 accountabilities were allowing a 'retreat' from the confrontation of difficult issues facing  
5 systems, such as agreeing action to achieve financial sustainability. Place-based partnerships,  
6 due to the informal nature of their working, were not seen as an appropriate forum for  
7 disagreement and difficult discussions. An Acute Trust Director in CS2 noted it was difficult  
8 to discuss performance issues in 'place', such as a reported lack of GP appointment availability  
9 causing an increase in demand for urgent care in hospital, particularly at a time when service  
10 providers were under a great deal of strain due to the response to COVID-19, and in light of  
11 voluntary nature of co-operation.  
12  
13  
14  
15  
16  
17  
18

## 19 **DISCUSSION AND CONCLUSION**

20  
21 Our findings suggest that the shift to collaborative working has been largely welcomed. While  
22 this was particularly the case for NHS organisations, other system partners, specifically Local  
23 Authorities and non-NHS providers, welcomed the shift to collaboration, but were more critical  
24 of the vehicle of ICSs due to the perceived NHS centric focus of ICS policy.  
25  
26  
27  
28

29 Wider context, referring to the broader contextual variables in which collaboration takes place,  
30 can enable or inhibit collaboration (35). The institutional context in the NHS is reshaping to  
31 accommodate collaborative approaches: commissioning mechanisms, pricing structures and  
32 financial incentives are subject to change, along with regulatory approaches. While progress in  
33 achieving system aims have been hampered by the operational response to the COVID-19  
34 pandemic, local actors felt that collaboration in systems led to improvements in ways that did  
35 not occur previously and, in particular, cited many examples of changes to service delivery that  
36 had been achieved through place-based partnerships. However, our findings suggest there are  
37 challenges in making decisions through ICSs, particularly in relation to reaching agreement  
38 concerning complex and/or difficult matters. These challenges need to be recognised as  
39 statutory ICBs enact their allocative responsibilities, and the complexity and scale of ICS  
40 activities and decisions increases.  
41  
42  
43  
44  
45  
46  
47  
48  
49

50 This study, based in case studies of three ICSs, provides a detailed and nuanced analysis of the  
51 ongoing development of ICSs, and the effectiveness of this form of collaboration as a means  
52 to achieving ICS goals. This is particularly important and timely given the recent legislation  
53 changes of HCA 2022 from July 2022. The study has certain limitations. *Firstly*, Phase 1 of  
54 the fieldwork (conducted between December 2019 and March 2020), was cut short due to the  
55 COVID-19 pandemic. We were not able to interview all partners in our case studies. In  
56  
57  
58  
59  
60

1  
2  
3 particular, we had fewer interviews in CS1 than intended. This restriction may have reduced  
4 nuance in the findings of this report. *Secondly*, as the study design consisted of three in depth  
5 case studies, it is not possible to make statistically based generalisations to the whole NHS.  
6  
7 However, as the study is based on a strong theoretical framework, it is possible to make  
8 analytical generalisations. We have noted the extent to which findings from the three case  
9 studies themselves converged and diverged. *Thirdly*, given the disruption of the pandemic, it  
10 is very difficult at this time to evaluate the extent to which ICSs are going to be able to allocate  
11 resources more efficiently across sectoral boundaries and bring their local health economies  
12 into financial balance.  
13  
14  
15  
16  
17  
18  
19

20 Earlier studies of systems (19, 24) found attention in developing STPs and ICSs was focused  
21 on ground work and preliminary activities, and it is notable that system governance  
22 arrangements are still subject to ongoing refinement. Ostrom's work highlights the influence  
23 of context, the local physical and material conditions, and community values, on collaboration  
24 (35). Our research suggests where complexity in the local context increases, particularly where  
25 there is a no 'natural fit' between the health and local government footprints, it can be very  
26 difficult for partners to move forward and agree governance arrangements. This is a particular  
27 risk in relation to partners outside the NHS, most pertinently local government, where there is  
28 weaker incentivisation in the first place to engage with system working. Where system and  
29 local council footprints aligned (as in CS2) statutory planning bodies involving local  
30 authorities, such as Health and Wellbeing Boards, could become incorporated into system  
31 architecture. CS3 was distinct as an illustration of the difficulties encountered where system  
32 and place spatial scales are not considered as coherent or meaningful groupings across health  
33 and local government. Our findings suggest that awkward boundaries can threaten local  
34 government 'buy-in' to strategic commissioning and planning discussions. Negotiation among  
35 multiple parties to achieve clarity about governance arrangements, drain resources and  
36 consume time. Furthermore, where governance arrangements are not considered coherent or  
37 meaningful this can limit engagement of partners.  
38  
39  
40  
41  
42  
43  
44  
45  
46  
47  
48  
49  
50  
51  
52

53 There is a balance to be struck between retaining flexibility at ICS level regarding governance  
54 arrangements, and having to follow national guidance. It has been noted that the ambition for  
55 local flexibility in HCA 2022 is encouraging as it is considered a key enabler of collaboration,  
56 and there are hopes this flexibility will be protected from *'the NHS's tendency to centralise,*  
57  
58  
59  
60



1  
2  
3 *which could lead to an overly prescriptive system architecture – despite everyone’s best*  
4 *intentions.’* (36)see also, (37). Ostrom points out that, for collaboration to be successful, actors  
5 need to be involved in the development of the rules of the game (30). Consequently it can be  
6 argued that the iterative development of governance arrangements among local parties is  
7 important in developing norms of trust and reciprocity between partners which underpin  
8 increased collaborative working, and encourage fairness and adherence to local rules (30).  
9 However, where a similar process is occurring in parallel systems, it can also be argued that  
10 ‘reinventing the wheel’ should be minimised. There is a case for increased support for systems  
11 in their task of putting in place clear ‘rules of the game’, including additional specified  
12 ‘scaffolding’ shaping governance requirements such as committee membership and  
13 accountability arrangements, to avoid unnecessary local discussion where local areas are all  
14 engaged in similar tasks. This is particularly pertinent in light of the lack of specification in  
15 HCA 2022 and associated guidance regarding to governance arrangements in place-based  
16 partnerships or provider collaboratives where it is anticipated many ICB functions will be  
17 delegated. However, local ‘fatigue’ regarding the ongoing refinement of governance  
18 arrangements should be acknowledged, particularly in light of the overriding importance of  
19 strong relationships rather than governance structures in securing collaboration in practice.  
20  
21  
22  
23  
24  
25  
26  
27  
28  
29  
30  
31  
32

33 Despite changes in the NHS institutional context to support adoption of ‘best for system’  
34 perspective, the reconciliation of system and individual responsibilities has the potential to  
35 disrupt collaboration. Like Walshe et al (24) we found that interviewees were not convinced  
36 that the separate statutory obligations of individual organisations would always be best served  
37 by taking decisions on a best-for-system perspective. This limits systems’ capacity to address  
38 difficult issues which may involve significant losses to partners. Importantly, making ICSs  
39 statutory bodies does not overcome this problem, as partner organisations will retain their  
40 organisational sovereignty, and consequently the capacity to disagree with system proposed  
41 plans. As Ostrom notes, the development of strong horizontal accountabilities within systems  
42 is an important precursor to collaborative working, allowing system partners to develop the  
43 necessary sanctions to build trust and ensure adherence of agreed ‘rules of the game’(30). We  
44 found that horizontal accountabilities between system members and informal accountabilities  
45 to the public were generally weak and under development. There are changes in HCA 2022  
46 which seek to further incentivise NHS organisations to favour a ‘best for system’ approach to  
47 decision making such as introducing a ‘duty of co-operate’ for NHS bodies and a ‘triple aim’  
48 duty to consider the effects of their decisions on the better health and wellbeing of everyone,  
49  
50  
51  
52  
53  
54  
55  
56  
57  
58  
59  
60

1  
2  
3 the quality of care for all patients, and the sustainable use of NHS resources. These measures  
4 may also be supported by the ongoing development of horizontal accountabilities. Still, an  
5 arbiter independent of local system members may be required to resolve disputes and it seems  
6 likely that the regional directors of NHSEI could undertake this role in practice.  
7  
8  
9

10  
11 Looking ahead, under HCA 2022 the collaborative approach will be applied to decisions  
12 regarding the allocation of resources. Our research raises a number of points in this regard.  
13 *Firstly*, the tensions in decision making in ICSs, particularly concerning addressing difficult  
14 issues, together with a lack of formal arrangements to deal with disagreements, could become  
15 significant fault lines as statutory ICBs enact their new commissioning responsibilities.  
16 *Secondly*, conflicts of interest in relation to commissioning decisions will be pervasive with no  
17 clear route for mitigation. Although interviewees felt negative consequences were outweighed  
18 by the benefits of collaborative decision making, arguably this issue goes to the heart of how  
19 ICBs will be able to operate in the interests of the local population as opposed to prioritising  
20 those of powerful organisations. It is not clear how, in the absence of a separate commissioning  
21 body whose sole role it is to achieve results without having undue regard to the effects on the  
22 finances of individual organisations, ICBs will be able to plan and commission services which  
23 best meet the needs of local populations. It is not clear that using the ICS model consensus will  
24 always be achieved, nor that it will be the optimum consensus for population health.  
25  
26  
27  
28  
29  
30  
31  
32  
33  
34  
35

36 In conclusion while the ICS model of collaboration has been embraced by local actors in the  
37 NHS and elsewhere, there remain significant challenges regarding agreeing governance,  
38 accountability and decision making arrangements. It is clearly important to continue to study  
39 the development of system working in the future to see how these issues are tackled as the  
40 effect of the pandemic diminishes and systems have longer experience of working together.  
41  
42  
43  
44  
45  
46  
47  
48

#### 49 **Funding statement**

50 This research is funded by the National Institute for Health Research (NIHR) Policy Research  
51 Programme, conducted through the Policy Research Unit in Health and Social Care Systems  
52 and Commissioning, PR-PRU-1217-20801. The views expressed are those of the authors and  
53 not necessarily those of the NIHR or the Department of Health and Social Care.  
54  
55  
56  
57  
58

#### 59 **Author Contributions**

1  
2  
3 All of the authors (MS, PA, DO, CP, OB and CL) met the criteria for authorship, and were  
4 involved in the design and data analysis of the study, and contributed to the drafting, revision  
5 and finalisation of this paper. In addition, OB, CL, DO, CP and MS collected the data for this  
6 study.  
7  
8  
9

### 10 **Competing interests**

11 All of the authors received grant funding from the Department of Health via its Policy Research  
12 Programme for this research. No authors have had financial relationships with any  
13 organisations that might have an interest in the submitted work in the previous three years, and  
14 no authors have any other relationships or activities that could appear to have influenced the  
15 submitted work.  
16  
17  
18  
19  
20  
21  
22

### 23 **Ethics approval**

24 NHS research governance approval from the HRA was granted on 6 August 2019 (266175/REC  
25 ref 19/HRA/3261). Ethical approval for the study was granted by the London School of  
26 Hygiene and Tropical Medicine internal ethics committee on 23 August 2019 (Ref:17711). The  
27 research received endorsement from the Association of Directors of Adult Social Services  
28 Executive Council on 19 November 2019.  
29  
30  
31  
32  
33  
34

### 35 **Data sharing statement**

36 No additional data are available  
37  
38  
39  
40  
41  
42  
43  
44  
45  
46  
47  
48  
49  
50  
51  
52  
53  
54  
55  
56  
57  
58  
59  
60

## References

1. NHS England, NHS Improvement. 2021/22 priorities and operational planning guidance. 2021.
2. Ham C. Competition and Integration in the English NHS. *BMJ*. 2008(336):805-7.
3. Bennett C, Ferlie E. Contracting in Theory and in Practice: some evidence from the NHS. *Public Administration*. 1996;74(Spring):49-66.
4. Allen P. A socio-legal and economic analysis of contracting in the NHS internal market using a case study of contracting for district nursing. *Social Science & Medicine*. 2002;54:255-66.
5. Frosini F, Dixon A, Robertson R. Competition in the NHS: a provider perspective. *Journal of Health Services Research and Policy*. 2012;17:16-22.
6. Porter A, Mays N, Shaw S, Rosen R, Smith J. Commissioning healthcare for people with long term conditions: the persistence of relational contracting in England's NHS quasi-market. *BMC Health Services Research*. 2013;13 (Suppl 1)(S2).
7. Department of Health and Social Care. Integration and Innovation: working together to improve health and social care for all. 2021.
8. NHS England. Five Year Forward View. London: NHS England, 2014.
9. Billings J, Mikelyte R, Coleman A, MacInnes J, Allen P, Croke S, et al. Supporting integrated care in practice: Perceptions of a national support programme for the development of New Care Models in England. *Journal of Integrated Care*. 2020;28:27-40.
10. NHS England. New Care Models: Vanguard - developing a blueprint for the future of NHS and care services. 2016.
11. Erens B, Wistow G, Mounier-Jacq S, Douglas N, Jones L, Mannacorda T, et al. Early evaluation of the Integrated Care and Support Pioneers Programme. Final report. London: Policy Innovation Research Unit (PIRU), 2016.
12. NHS England, NHS Improvement, Care Quality Commission, Health Education England, National Institute of Health and Care Excellence, England. PH. Delivering the Forward View: NHS planning guidance. London: 2015.
13. NHS England. The Long Term Plan. 2019.
14. Hammond J, Lorne C, Coleman A, Allen P, Mays N, Dam R, et al. The spatial politics of place and health policy: Exploring Sustainability and Transformation Plans in English NHS. *Social Science & Medicine*. 2017;190:217-26.
15. NHS England and NHS Improvement. NHS System Oversight Framework 2021/22. 2021.
16. NHS England and NHS Improvement. NHS Operational Planning and Contracting Guidance 2019/20. 2019.
17. DHSC. Integration and Innovation: working together to improve health and social care for all. 2021.
18. NHS England and NHS Improvement. ICS Design Framework. 2021.
19. Charles A, Wenzel L, Kershaw M, Ham C, Walsh N. A year of integrated care systems. London: The King's Fund, 2018.
20. Pett W. Accelerating transformation: How systems are funding and resourcing 'engine room' staff. London: NHs Confederation, 2019.
21. Pett W. STPs: One year to go? London: NHS Confederation, 2020.
22. Timmins N. Leading for Integrated Care. London: The King's Fund, 2019.
23. Lorne C, McDonald R, Walshe K, Coleman A. Regional assemblage and the spatial reorganisation of health and care: the case of devolution in Greater Manchester, England. *Sociology of Health & Illness*. 2019;41(7):1236-50.
24. Walshe K, Lorne C, Coleman A, McDonald R, Turner A. Devolving health and social care: Learning from Greater Manchester. Manchester: The University of Manchester, 2018.
25. Moran V, Allen P, Sanderson M, McDermott I, Osipovic D. Challenges of maintaining accountability in networks of health and care organisations: A study of developing Sustainability and

- 1  
2  
3 Transformation Partnerships in the English National Health Service. *Social Science & Medicine*.  
4 2020;268.
- 5 26. NHS Providers and NHS Clinical Commissioners. Driving forward system working: a snapshot  
6 of early progress in collaborative commissioning. London: NHS Confederation and the Foundation  
7 Trust Network., 2018.
- 8 27. Ansell C, Gash A. Collaborative Governance in Theory and Practice. *Journal of Public*  
9 *Administration Research and Theory*. 2008;18(4):543-71.
- 10 28. Popp JK, Casebeer, A. Be careful what you ask for: Things policy-makers should know before  
11 mandating networks. *Healthcare Management Forum*. 2015;28(6).
- 12 29. Ostrom E. *Governing the commons, The evolution of institutions for collective action*.  
13 Cambridge: Cambridge University Press; 1990.
- 14 30. Ostrom E. *Neither market nor state: governance of common-pool resources in the twenty-*  
15 *first century*. 1994.
- 16 31. Sanderson M, Allen P, Moran V, McDermott I, Osipovic D. Agreeing the allocation of scarce  
17 resources in the English NHS: Ostrom, common pool resources and the role of the state. *Social*  
18 *Science & Medicine*. 2020:112888.
- 19 32. Ham C, Alderwick H. *Place-based systems of care. A way forward for the NHS in England*.  
20 London: The King's Fund, 2015.
- 21 33. Sanderson M, Allen P, Osipovic D, Petsoulas C, Lau Y, Boiko O, et al. *The Developing*  
22 *Architecture of System Management: Integrated Care Systems and Sustainability and*  
23 *Transformation Partnerships*. PRUComm, 2022.
- 24 34. Lorne C, Allen P, Checkland K, Osipovic D, Sanderson M, Hammond J, et al. *Integrated Care*  
25 *Systems: What can current reforms learn from past research on regional co-ordination of health and*  
26 *care in England? A literature review*. PRUComm, 2019.
- 27 35. Ostrom E. *Understanding Institutional Diversity*. Princeton and Oxford: Princeton University  
28 Press; 2005.
- 29 36. Deakin M. 'Does the buck stop with integrated care systems?'. *Health Service Journal* 2021.
- 30 37. Alderwick H, Gardner T, Mays N. England's new health and care bill. The health secretary  
31 gains sweeping new powers, with unclear consequences for patients. *BMJ* 2021;374:n1767.
- 32  
33  
34  
35  
36  
37  
38  
39  
40  
41  
42  
43  
44  
45  
46  
47  
48  
49  
50  
51  
52  
53  
54  
55  
56  
57  
58  
59  
60

## Standards for Reporting Qualitative Research (SRQR)

| No.                       | Topic                                                                                        | Item                                                                                                                                                                                                                                                                                                                                             |
|---------------------------|----------------------------------------------------------------------------------------------|--------------------------------------------------------------------------------------------------------------------------------------------------------------------------------------------------------------------------------------------------------------------------------------------------------------------------------------------------|
| <b>Title and abstract</b> |                                                                                              |                                                                                                                                                                                                                                                                                                                                                  |
| S1                        | Title                                                                                        | Concise description of the nature and topic of the study identifying the study as qualitative or indicating the approach (e.g., ethnography, grounded theory) or data collection methods (e.g., interview, focus group) is recommended                                                                                                           |
| S2                        | Abstract                                                                                     | Summary of key elements of the study using the abstract format of the intended publication; typically includes background, purpose, methods, results, and conclusions                                                                                                                                                                            |
| <b>Introduction</b>       |                                                                                              |                                                                                                                                                                                                                                                                                                                                                  |
| S3                        | Problem formulation                                                                          | Description and significance of the problem/phenomenon studied; review of relevant theory and empirical work; problem statement                                                                                                                                                                                                                  |
| S4                        | Purpose or research question                                                                 | Purpose of the study and specific objectives or questions                                                                                                                                                                                                                                                                                        |
| <b>Methods</b>            |                                                                                              |                                                                                                                                                                                                                                                                                                                                                  |
| S5                        | Qualitative approach and research paradigm                                                   | Qualitative approach (e.g., ethnography, grounded theory, case study, phenomenology, narrative research) and guiding theory if appropriate; identifying the research paradigm (e.g., postpositivist, constructivist/interpretivist) is also recommended; rationale <sup>b</sup>                                                                  |
| S6                        | Researcher characteristics and reflexivity                                                   | Researchers' characteristics that may influence the research, including personal attributes, qualifications/experience, relationship with participants, assumptions, and/or presuppositions; potential or actual interaction between researchers' characteristics and the research questions, approach, methods, results, and/or transferability |
| S7                        | Context                                                                                      | Setting/site and salient contextual factors; rationale <sup>b</sup>                                                                                                                                                                                                                                                                              |
| S8                        | Sampling strategy                                                                            | How and why research participants, documents, or events were selected; criteria for deciding when no further sampling was necessary (e.g., sampling saturation); rationale <sup>b</sup>                                                                                                                                                          |
| S9                        | Ethical issues pertaining to human subjects                                                  | Documentation of approval by an appropriate ethics review board and participant consent, or explanation for lack thereof, other confidentiality and data security issues                                                                                                                                                                         |
| S10                       | Data collection methods                                                                      | Types of data collected; details of data collection procedures including (as appropriate) start and stop dates of data collection and analysis, iterative process, triangulation of sources/methods, and modification of procedures in response to evolving study findings; rationale <sup>b</sup>                                               |
| S11                       | Data collection instruments and technologies                                                 | Description of instruments (e.g., interview guides, questionnaires) and devices (e.g., audio recorders) used for data collection; if/how the instrument(s) changed over the course of the study                                                                                                                                                  |
| S12                       | Units of study                                                                               | Number and relevant characteristics of participants, documents, or events included in the study; level of participation (could be reported in results)                                                                                                                                                                                           |
| S13                       | Data processing                                                                              | Methods for processing data prior to and during analysis, including transcription, data entry, data management and security, verification of data integrity, data coding, and anonymization/deidentification of excerpts                                                                                                                         |
| S14                       | Data analysis                                                                                | Process by which inferences, themes, etc., were identified and developed, including the researchers involved in data analysis; usually references a specific paradigm or approach; rationale <sup>b</sup>                                                                                                                                        |
| S15                       | Techniques to enhance trustworthiness                                                        | Techniques to enhance trustworthiness and credibility of data analysis (e.g., member checking, audit trail, triangulation); rationale <sup>b</sup>                                                                                                                                                                                               |
| <b>Results/findings</b>   |                                                                                              |                                                                                                                                                                                                                                                                                                                                                  |
| S16                       | Synthesis and interpretation                                                                 | Main findings (e.g., interpretations, inferences, and themes); might include development of a theory or model, or integration with prior research or theory                                                                                                                                                                                      |
| S17                       | Links to empirical data                                                                      | Evidence (e.g., quotes, field notes, text excerpts, photographs) to substantiate analytic findings                                                                                                                                                                                                                                               |
| <b>Discussion</b>         |                                                                                              |                                                                                                                                                                                                                                                                                                                                                  |
| S18                       | Integration with prior work, implications, transferability, and contribution(s) to the field | Short summary of main findings; explanation of how findings and conclusions connect to, support, elaborate on, or challenge conclusions of earlier scholarship; discussion of scope of application/generalizability; identification of unique contribution(s) to scholarship in a discipline or field                                            |
| S19                       | Limitations                                                                                  | Trustworthiness and limitations of findings                                                                                                                                                                                                                                                                                                      |
| <b>Other</b>              |                                                                                              |                                                                                                                                                                                                                                                                                                                                                  |
| S20                       | Conflicts of interest                                                                        | Potential sources of influence or perceived influence on study conduct and conclusions; how these were managed                                                                                                                                                                                                                                   |
| S21                       | Funding                                                                                      | Sources of funding and other support; role of funders in data collection, interpretation, and reporting                                                                                                                                                                                                                                          |

<sup>a</sup>The authors created the SRQR by searching the literature to identify guidelines, reporting standards, and critical appraisal criteria for qualitative research; reviewing the reference lists of retrieved sources; and contacting experts to gain feedback. The SRQR aims to improve the transparency of all aspects of qualitative research by providing clear standards for reporting qualitative research.

<sup>b</sup>The rationale should briefly discuss the justification for choosing that theory, approach, method, or technique rather than other options available, the assumptions and limitations implicit in those choices, and how those choices influence study conclusions and transferability. As appropriate, the rationale for several items might be discussed together.

ACADEMIC MEDICINE

51. Title identifies study as qualitative (title page)

52. Abstract adheres to BMJ Open guidelines (Abstract)

53/54. Introduction adheres to guidance (p4-8)

55. Qualitative approach is described (p9-10. Guiding theory (p6-7)

56. Researcher characteristics that would influence the research were not identified.

57. Case studies briefly described (p10)

58. Selection criteria described (p9).

59. Ethics approval detailed (p20)

510. Data collection methods

described (p9-10)

511. Interview topics described (p10)

512. Number of participants and characteristics described (Table 1 and 2)

513. Analysis described (p10)

514. Process of analysis described (p10)

515. Process described in methods (p10-11)

516/517. Findings are linked to prior research (p18). Quotes throughout findings (p11-17)

518/519 Discussion summarises findings and links to earlier scholarship.

(p18) Scope of application discussed and limitations (p17-18)

520/521 Conflicts of interest and funding acknowledged (p20)

# BMJ Open

## The developing architecture of system management in the English NHS: evidence from a qualitative study of three Integrated Care Systems

|                                 |                                                                                                                                                                                                                                                                                                                                                                                                                                                                                                      |
|---------------------------------|------------------------------------------------------------------------------------------------------------------------------------------------------------------------------------------------------------------------------------------------------------------------------------------------------------------------------------------------------------------------------------------------------------------------------------------------------------------------------------------------------|
| Journal:                        | <i>BMJ Open</i>                                                                                                                                                                                                                                                                                                                                                                                                                                                                                      |
| Manuscript ID                   | bmjopen-2022-065993.R2                                                                                                                                                                                                                                                                                                                                                                                                                                                                               |
| Article Type:                   | Original research                                                                                                                                                                                                                                                                                                                                                                                                                                                                                    |
| Date Submitted by the Author:   | 24-Jan-2023                                                                                                                                                                                                                                                                                                                                                                                                                                                                                          |
| Complete List of Authors:       | Sanderson, Marie; London School of Hygiene and Tropical Medicine Faculty of Public Health and Policy<br>Allen, Pauline; London School of Hygiene and Tropical Medicine Faculty of Public Health and Policy<br>Osipovic, Dorota; London School of Hygiene and Tropical Medicine Faculty of Public Health and Policy<br>Petsoulas, Christina; London School of Hygiene and Tropical Medicine Faculty of Public Health and Policy<br>Boiko, O.; King's College London<br>Lorne, C.; The Open University |
| <b>Primary Subject Heading</b>: | Health policy                                                                                                                                                                                                                                                                                                                                                                                                                                                                                        |
| Secondary Subject Heading:      | Health services research, Qualitative research                                                                                                                                                                                                                                                                                                                                                                                                                                                       |
| Keywords:                       | Health policy < HEALTH SERVICES ADMINISTRATION & MANAGEMENT, Organisation of health services < HEALTH SERVICES ADMINISTRATION & MANAGEMENT, QUALITATIVE RESEARCH, HEALTH SERVICES ADMINISTRATION & MANAGEMENT                                                                                                                                                                                                                                                                                        |
|                                 |                                                                                                                                                                                                                                                                                                                                                                                                                                                                                                      |

SCHOLARONE™  
Manuscripts



I, the Submitting Author has the right to grant and does grant on behalf of all authors of the Work (as defined in the below author licence), an exclusive licence and/or a non-exclusive licence for contributions from authors who are: i) UK Crown employees; ii) where BMJ has agreed a CC-BY licence shall apply, and/or iii) in accordance with the terms applicable for US Federal Government officers or employees acting as part of their official duties; on a worldwide, perpetual, irrevocable, royalty-free basis to BMJ Publishing Group Ltd ("BMJ") its licensees and where the relevant Journal is co-owned by BMJ to the co-owners of the Journal, to publish the Work in this journal and any other BMJ products and to exploit all rights, as set out in our [licence](#).

The Submitting Author accepts and understands that any supply made under these terms is made by BMJ to the Submitting Author unless you are acting as an employee on behalf of your employer or a postgraduate student of an affiliated institution which is paying any applicable article publishing charge ("APC") for Open Access articles. Where the Submitting Author wishes to make the Work available on an Open Access basis (and intends to pay the relevant APC), the terms of reuse of such Open Access shall be governed by a Creative Commons licence – details of these licences and which [Creative Commons](#) licence will apply to this Work are set out in our licence referred to above.

Other than as permitted in any relevant BMJ Author's Self Archiving Policies, I confirm this Work has not been accepted for publication elsewhere, is not being considered for publication elsewhere and does not duplicate material already published. I confirm all authors consent to publication of this Work and authorise the granting of this licence.



1  
2  
3  
4  
5 The developing architecture of system management in the English NHS: evidence from a  
6 qualitative study of three Integrated Care Systems  
7  
8  
9

10 Authors

11 Marie Sanderson ([Marie.Sanderson@lshtm.ac.uk](mailto:Marie.Sanderson@lshtm.ac.uk))

12  
13 Pauline Allen ([Pauline.Allen@lshtm.ac.uk](mailto:Pauline.Allen@lshtm.ac.uk))

14  
15 Dorota Osipovic ([Dorota.Osipovic@lshtm.ac.uk](mailto:Dorota.Osipovic@lshtm.ac.uk))

16  
17 Christina Petsoulas ([Christina.Petsoulas@lshtm.ac.uk](mailto:Christina.Petsoulas@lshtm.ac.uk))

18  
19 Olga Boiko ([olga.boiko1@gmail.com](mailto:olga.boiko1@gmail.com))

20  
21 Colin Lorne ([colin.lorne@open.ac.uk](mailto:colin.lorne@open.ac.uk))  
22  
23  
24  
25  
26  
27  
28  
29

30 Corresponding author: Dr Marie Sanderson, HSRP, LSHTM, 15-17 Tavistock Place, London,  
31 WC1H 9SH, [Marie.Sanderson@lshtm.ac.uk](mailto:Marie.Sanderson@lshtm.ac.uk)  
32  
33  
34  
35

36 Word count: 7952  
37  
38  
39  
40  
41  
42  
43  
44  
45  
46  
47  
48  
49  
50  
51  
52  
53  
54  
55  
56  
57  
58  
59  
60

## Abstract

### **Objective**

Integrated Care Systems (ICSs) mark a change in the English NHS to more collaborative inter-organisational working. We explored how effective the ICS form of collaboration is in achieving its goals by investigating how ICSs were developing, how system partners were balancing organisational and system responsibilities, how partners could be held to account and how local priorities were being reconciled with ICS priorities.

### **Design**

We carried out detailed case studies in three ICSs, each consisting of a system and its partners, using interviews, documentary analysis and meeting observations.

### **Setting/participants**

We conducted 64 in-depth, semi-structured interviews with Director level representatives of ICS partners and observed eight meetings (three in Case Study 1, three in Case Study 2 and two in Case Study 3).

### **Results**

Collaborative working was welcomed by system members. The agreement of local governance arrangements was ongoing and challenging. System members found it difficult to balance system and individual responsibilities, with concerns that system priorities could run counter to organisational interests. Conflicts of interest were seen as inherent, but the benefits of collaborative decision making were perceived to outweigh risks. There were multiple examples of work being carried out across systems and ‘places’ to share resources, change resource allocation and improve partnership working. Some interviewees reported reticence addressing difficult issues collaboratively, and that organisations’ statutory accountabilities were allowing a ‘retreat’ from the confrontation of difficult issues facing systems, such as agreeing action to achieve financial sustainability.

### **Conclusions**

There remain significant challenges regarding agreeing governance, accountability and decision making arrangements which are particularly important due to the recent Health and Care Act 2022 which gave ICSs allocative functions for the majority of health resources for

1  
2  
3 local populations. An arbiter who is independent of the ICS may be required to resolve disputes,  
4 along with increased support for shaping governance arrangements.  
5  
6  
7  
8  
9

## 10 **Article summary**

### 11 **Strengths and limitations of this study**

- 12
- 13
- 14
- 15 • This is a qualitative study of the development of Integrated Care Systems in the
- 16 English NHS between 2019 and 2021
- 17 • The three in-depth case studies of Integrated Care Systems include 64 in-depth, semi-
- 18 structured interviews, observation of eight system level meetings and documentary
- 19 analysis
- 20 • The case studies may not be representative of all national developments
- 21 • Phase 1 of the fieldwork was cut short due to the COVID-19 pandemic which may
- 22 have reduced the nuance of findings
- 23
- 24
- 25
- 26
- 27
- 28
- 29

30 Keywords: NHS, integration, collaboration, governance, inter-organisational  
31  
32  
33  
34  
35  
36  
37  
38  
39  
40  
41  
42  
43  
44  
45  
46  
47  
48  
49  
50  
51  
52  
53  
54  
55  
56  
57  
58  
59  
60

The developing architecture of system management in the English NHS: evidence from a qualitative study of three Integrated Care Systems

Sanderson, M., Allen, P., Osipovic, D., Petsoulas, C., Boiko, O., Lorne, C.

## POLICY BACKGROUND

Integrated Care Systems (ICSs) are a policy initiative in the English NHS (NHS, hereafter) whereby local ‘systems’ of providers and commissioners of NHS services, together with local authorities and other local partners (such as voluntary and community sector organisations) collectively plan health and care services for local populations. The approach is expected to achieve improved outcomes in population health and healthcare, reductions in inequalities in outcomes, experience and access, and enhanced productivity and value for money, in addition to helping the NHS to support wider social and economic development (1). In stark contrast with the growing salience of ICSs, there is a paucity of empirical research concerning collaborative decision making in ICSs in practice. It is particularly important to examine the ICS model now given the recent Health and Care Act (HCA 2022) which put ICSs on a statutory footing from July 2022, and gave them allocative functions for the majority of health resources for local populations. This paper reports a recent study examining how ICSs were developing in the period prior to HCA 2022 and how effective the ICS form of collaboration is as a means to achieve its goals.

In order to understand the ICS model, it is necessary to first clarify ICS policy and situate ICSs within the wider context of the NHS. Alongside the use of market mechanisms to promote competition in the NHS since the 1990s, there has been an ongoing reliance on collaboration, with a long history of the development of collaborative approaches to jointly plan and deliver health, social care and public health services alongside other services (2). Collaboration has always been an important behaviour in the English NHS, as illustrated by many empirical studies which describe the persistence of collaborative behaviour amongst commissioners and providers of NHS services since the establishment of the internal market (3-6). However, while co-operation was always a feature of NHS policy and legislation, the development of ICSs has accompanied a fundamental shift away from the architecture of the internal NHS market to foreground collaboration as the dominant mode of co-ordination. NHS policy now describes competition as ‘*transactional bureaucracy*’ standing in the way of ‘*sensible decision making*’ (7) and the recent legislative changes have formally removed competition as a co-ordinating force in the NHS.

1  
2  
3 With publication of *The Five Year Forward View* (8), which laid out a vision to improve care  
4 delivery through breaking down barriers between different organisations and care sectors,  
5 ‘integration’ became a formal policy objective.<sup>1</sup> This led to policy initiatives which focused on  
6 improving the co-ordination of service provision across organisational boundaries such as the  
7 Vanguard New Care Models programme and the Integrated Care and Support Pioneers  
8 exemplars (9-11). Alongside these developments, Sustainability and Transformation Plans  
9 were first introduced in 2015 as NHS organisations and local authorities (which are responsible  
10 for social care provision) were asked to work together to develop services for their local  
11 population (12). Sustainability and Transformation Partnerships (STPs) and ICSs (a more  
12 ‘mature’ form of STPs) were introduced from 2016<sup>2</sup> as ‘bottom-up’ partnership arrangements,  
13 bringing together local organisations to deliver the ‘triple integration’ of primary and specialist  
14 care, physical and mental health services, and health with social care (13).

15  
16  
17  
18  
19  
20  
21  
22  
23  
24  
25  
26 The core tenet underlying ICSs is that the health and care needs of local populations will be  
27 best met if organisations planning and providing health and care services to that population  
28 agree collective strategies for resource utilisation. The 42 ICSs across England follow a three-  
29 tier geographically-defined model (systems, places and neighbourhoods) in which  
30 collaboration at each scale addresses different aims. At ‘system’ scale (population size of 1-3  
31 million covering the whole ICS footprint), collective decision making focuses on strategic  
32 change, the development of governance and accountability arrangements, the management of  
33 performance and collective resources and identification and sharing of best practice. ‘Places’  
34 within systems (population size of 250,000 – 500,000 and organised typically at borough/local  
35 authority level) are expected to focus on service integration, the development of anticipatory  
36 care, out of hospital care and hospital discharge. ‘Neighbourhoods’ (population size of 35,000-  
37 50,000 and based around non-statutory Primary Care Networks (PCNs) of groups of GP  
38 practices) are expected to improve integration of primary health services with community  
39 health care services and other local health and care organisations. In practice systems (and  
40 ‘places’ and ‘neighbourhoods’) vary considerably in terms of population size and  
41  
42  
43  
44  
45  
46  
47  
48  
49  
50  
51  
52  
53

---

54  
55 <sup>1</sup> There is no single definition of integration, and the term is used to encapsulate a variety of types of co-  
56 operation including integration at service, organisational or clinical level, at macro level (across a population),  
57 meso level( for a particular patient group) and at micro level (for individual patient)

58  
59 <sup>2</sup> STPs were in existence until April 2021 when the last remaining STPs in England gained ICS status. For reasons  
60 of clarity, this paper will use the term ICS only.

1  
2  
3 organisational complexity, reflecting local factors such as demography and existing networks  
4 of collaboration, and may elude neat containment within coherent territorial geographies (14).  
5  
6  
7  
8

9 It is particularly important to examine how ICSs are developing as the 'system' has become  
10 the central mechanism through which the achievement of NHS goals is co-ordinated. Systems  
11 are expected to develop co-ordinated plans for NHS activity, workforce and money. The  
12 approach taken by the NHS economic and structural regulator - NHS England and  
13 Improvement (NHSEI) - is tailored to give primacy to the system in financial and performance  
14 matters, alongside NHS organisations' individual accountabilities (which remain unaffected)  
15 (15). Additionally, financial rewards are being linked to system rather than individual  
16 organisation performance, such as linking the attainment of system financial targets to financial  
17 rewards for individual NHS organisations (16).  
18  
19  
20  
21  
22  
23  
24  
25  
26

27 ICSs have recently become even more significant bodies. The recent HCA 2022 put ICSs on a  
28 statutory footing from July 2022, consisting of a dual structure of a statutory body, the  
29 Integrated Care Board (ICB) (focused on integration within the NHS and accountable for NHS  
30 resources), and a statutory committee, the Integrated Care Partnership (ICP) (focused on  
31 integration between NHS, local government and wider partners). Clinical Commissioning  
32 Groups (formerly the commissioning bodies) were abolished with the transfer of allocative  
33 functions to the ICBs. Consequently ICBs now have responsibility for commissioning acute,  
34 community and mental health NHS services for their population, primary medical care, with  
35 possible further delegations from NHSEI including other primary care budgets.  
36  
37  
38  
39  
40  
41  
42  
43  
44

45 It is important to understand collaboration within the wider institutional context. Of particular  
46 importance in relation to ICS policy is the permissive nature of governance arrangements. ICSs  
47 have considerable freedom to decide their own local governance arrangements rather than  
48 following a prescribed national blueprint. At the time of the research each ICS could tailor  
49 governance arrangements to suit local circumstances, within minimum governance  
50 requirements for a 'Partnership Board' which provides a forum for collective action on issues  
51 that affect all system members (13), and this minimal and permissive approach remains the  
52 case under the HCA 2022. The permissive nature of local governance has significant  
53 implications when coupled with the principle of subsidiarity (where decisions are taken closest  
54  
55  
56  
57  
58  
59  
60

1  
2  
3 to those affected). This is particularly so in light of HCA 2022 which carries the expectation  
4 that statutory ICBs will delegate substantial decision-making regarding the allocation of  
5 resources to committees and sub-committees, such as ‘place-based committees’ and provider  
6 collaboratives (non-statutory partnership arrangements involving two or more trusts) (17, 18),  
7 for which there are no national governance requirements. It is therefore important to understand  
8 how ICSs are addressing the challenge of agreeing local governance arrangements while  
9 addressing the principle of subsidiarity.  
10  
11  
12  
13  
14  
15  
16

17 A second important aspect of ICS collaboration relates to organisational sovereignty.  
18 Collaboration necessarily remains a voluntary, consensual, non-binding model of co-ordination  
19 (although effectively mandated by NHS policy for NHS organisations), and providers remain  
20 separate organisations with their own organisational interests, and accountabilities, and  
21 freedom to dissent. All system partners have their own accountabilities and statutory  
22 responsibilities which they must hold in regard when agreeing collective system plans. For  
23 example NHS Trusts and Foundation Trusts (FTs) have legal duties to provide safe care and  
24 treatment (HSCA 2008) and FT boards have a duty to act with a view to promoting the success  
25 of the Trust to maximise the benefits for the members of the Trust as a whole and for the public  
26 (HSCA 2012). NHS Trusts and FTs have direct accountability to NHS England for their  
27 performance. System partners from outside the NHS, such as local government or independent  
28 sector organisations, are subject to separate institutional contexts regarding priorities, ways of  
29 working and financial rules.  
30  
31  
32  
33  
34  
35  
36  
37  
38  
39

40 Thirdly, ICSs exist in a complex landscape of pre-existing partnerships and planning networks  
41 which must be accounted for, such as Health and Wellbeing Boards (formal committees of  
42 Local Authorities, which have a statutory duty, with CCGs, to produce joint strategic needs  
43 assessments and joint health and wellbeing strategies for their local population).  
44  
45  
46  
47

48 These complexities raise questions about how collaborative decision making in ICSs will work  
49 in practice, including the extent to which organisational sovereignty disrupts the ability of  
50 systems to achieve consensus. Now that the HCA 2022 has come into force, ICSs have  
51 significant allocative responsibilities, and are subject to associated expectations including of  
52 improved outcomes (1). To make headway with this agenda, ICSs will need to agree suitable local  
53 governance arrangements to discharge their functions according to the principle of subsidiarity,  
54 and make challenging collective decisions, which may be perceived as disadvantaging individual  
55 members. It is important to examine how these issues have been experienced and addressed in ICSs  
56  
57  
58  
59  
60

1  
2  
3 to date. A small number of empirical studies have been published which are concerned with the  
4 development of collaborative arrangements within ICSs (19-24), and the development of  
5 commissioning in the light of system collaboration (25, 26). The study reported in this paper  
6 makes a significant contribution to this empirical evidence by providing a nuanced analysis of  
7 the development of governance, accountability and decision making arrangements in three  
8 ICSs.  
9

10  
11  
12  
13  
14 ICS policy does not explicitly draw on theory to explain how the use of collaborative decision-  
15 making processes will lead to the attainment of ICS aims such as enhancing productivity and  
16 value for money. Perspectives from political science and public administration can be deployed  
17 to analyse the development of collective action in ICSs, or to facilitate successful collective  
18 action, such as Jones et al.'s use of Ansell and Gash's conceptual model of collaborative  
19 governance to inform the development of the role, behaviour and skills of medical leaders of  
20 ICSs (27, 28). We have chosen to focus on the work of Ostrom (29, 30), rooted in economic  
21 theories of co-operation, which suggests that, contrary to the received wisdom of 'the tragedy  
22 of the commons', communities can co-operate to self-manage limited shared ('common pool')  
23 resources in a way that benefits all community members and leads to the sustainability of the  
24 resource. Ostrom's conceptualisation of common pools as limited natural or man-made  
25 resource systems on which multiple parties depend, has resonance with collectivism and  
26 universality of public services in the context of finite resources (31, 32). The development and  
27 functioning of system working in the English NHS in which local 'systems' are required to  
28 adopt collective resource utilisation strategies to manage a finite local pot has evoked  
29 connections with the work of Ostrom, and led to the use of her theories as an analytic  
30 framework to understand the development of system working (33, 34).  
31  
32  
33  
34  
35  
36  
37  
38  
39  
40  
41  
42  
43  
44

45 A cornerstone of Ostrom's work is her design principles which describe the conditions required  
46 for communities' successful self-governance of common pool resources. The principles  
47 address the need for 'communities' to set up clear boundaries and membership, agree for  
48 themselves rules regarding how resources will be used, establish a balance between costs and  
49 benefits of collaboration and agree the process for monitoring of behaviour and sanctions (29).  
50 The principles also allow that wider context, referring to the broader contextual variables in  
51 which collaboration takes place, can enable or inhibit collaboration, for example monitoring,  
52 enforcement and sanctioning institutions, and the relationships between actors. Ostrom's  
53 design principles are of value both as a 'heuristic' to guide collective approaches to the  
54  
55  
56  
57  
58  
59  
60



1  
2  
3 planning and delivery public services (35), and as an analytic frame through which to interpret  
4 collective approaches. This paper draws on these design principles as a frame to help  
5 understand the ways in which ICSs and the wider context in which they are situated support  
6 the development of collaborative decision-making through the system approach.  
7  
8  
9

## 10 11 12 **STUDY QUESTIONS**

13  
14 Our research questions were based on our understanding of ICS policy, and the literature  
15 regarding economic theories of co-operation, in particular the work of Ostrom (30). The  
16 questions focus on three broad areas: firstly, how decisions are being made in ICSs; secondly,  
17 how ICS partners are balancing collective and individual interests; and thirdly, what kind of  
18 decisions systems are making regarding the allocation of resources.  
19  
20  
21  
22

23  
24 In relation to the first area, how decisions are being made in ICSs, we wanted to establish: how  
25 the local leadership and cooperative arrangements with stakeholders (statutory, independent  
26 and community-based, including local authorities) were governed in light of policy  
27 recommendations. Secondly, in terms of the balancing of collective and individual interests,  
28 the study addressed: how individual organisations are reconciling their role in an ICS with their  
29 individual roles, accountabilities and statutory responsibilities. Thirdly, we wanted to establish  
30 what decisions regarding the allocation of resources are being made through ICSs, in particular  
31 whether ICSs are able to allocate resources more efficiently across sectoral boundaries and  
32 bring their local health economies into financial balance.  
33  
34  
35  
36  
37  
38

39  
40 Our research was divided into two phases. The first phase focused on the system scale. In the  
41 second phase of our research we addressed similar questions while focusing on the  
42 development of 'place-based partnerships', and the developing role of the regional NHSEI  
43 function (regional teams which are responsible for the quality, financial and operational  
44 performance of all NHS organisations in their area).  
45  
46  
47  
48

## 49 **STUDY DESIGN**

50  
51 The study used qualitative methods with an additional quantitative component. The results of  
52 the quantitative analysis are included in our final report (36). Primarily, we used a case study  
53 research design, consisting of three in-depth case studies, each consisting of a system and its  
54 partners. The use of case studies was thought to be the most appropriate research design for  
55 this study as interviews and documentary analysis were informed by the contextual information  
56 we were able to gather by concentrating on three specific systems. An initial literature review  
57  
58  
59  
60

of NHS system governance (37) was drawn on to inform strategy when selecting case study sites. This literature review led to the identification of various characteristics of interest in local contexts which might be important in relation to how system working developed. These included: the number and variety of providers of NHS services in the system; the number of local authorities within systems; and the degree of fit between health and local authority boundaries. We shortlisted systems which had one or more of the following characteristics: system boundaries which did not correspond to local authority boundaries; the presence of private sector and/or social enterprise partners; a concentration of providers; a concentration of local authorities. From our shortlist, we sought to recruit case study sites which demonstrated variance across these characteristics. Additionally, as we were also interested in the role of the regional NHSEI function, we sought to select case study sites from differing NHSEI regions. In Phase 2 of the research a single 'place' within our three case studies was identified based on characteristics of interest emerging from the Phase 1.

The first phase of fieldwork was undertaken between December 2019 and March 2020 and focused on studying ICSs (and their predecessor STPs). Fieldwork was interrupted in March 2020 by the COVID-19 pandemic. In particular we had fewer interviewees in CS1 than intended. The second phase of fieldwork took place between January 2021 and September 2021 and focused on a more detailed examination of a selected 'place' within each of our case studies. All interviews in the second phase of the fieldwork were conducted over an online platform rather than face to face. We conducted a total of 64 in-depth, semi-structured interviews (see Tables 1 and 2) and observed eight system level meetings (three in CS1, three in CS2 and two in CS3). Interviewees were recruited due to their role as senior management representatives of system partners who participated in the main decision-making forums at system scale, and within the selected 'place'. All participants gave informed consent. Topic guides related to the study questions described above. The purpose of observing a variety of meetings was to supplement the information we obtained from interviews. In addition, we gathered documentation from all three case study sites which included strategic plans, meeting papers and details of governance structures. These sources were used to add detail to the interview accounts.

*Table 1: Phase 1 interviews by case study site and organisational type*

| <b>Organisation</b> | <b>Case Study 1</b> | <b>Case Study 2</b> | <b>Case Study 3</b> | <b>Total interviews</b> |
|---------------------|---------------------|---------------------|---------------------|-------------------------|
| ICS leadership      | 2                   | 4                   | 2                   | 8                       |
| CCG                 | 0                   | 1                   | 1                   | 2                       |
| NHS Providers       | 3                   | 3                   | 4                   | 10                      |

|                   |   |    |    |    |
|-------------------|---|----|----|----|
| Local Authorities | 1 | 1  | 4  | 6  |
| Primary Care      | 0 | 0  | 0  | 0  |
| Other Providers   | 0 | 2  | 0  | 2  |
| Total interviews  | 6 | 11 | 11 | 28 |

Table 2: Phase 2 interviewees by case study site and organisational type

| Organisation     | Case Study 1 | Case Study 2 | Case Study 3 | Total interviewees |
|------------------|--------------|--------------|--------------|--------------------|
| ICS leadership*  | 2            | 2            | 3            | 7                  |
| Regional NHSEI   | 1            | 1            | 1            | 3                  |
| CCG              | 3            |              | 5            | 8                  |
| NHS Providers    | 2            | 2            | 3            | 7                  |
| Local Government | 1            | 2            | 3            | 6                  |
| Primary Care     | 1            | 1            | 1            | 3                  |
| Other Providers  |              | 1            |              | 1                  |
| Other            |              | 1            |              | 1                  |
| Total interviews | 10           | 10           | 16           | 36                 |

\*Where an interviewee held a joint ICS/CCG role, this is recorded as an ICS leadership interviewee

The three case study sites (which consisted of one ICS and two STPs at the time of recruitment) are located in different parts of England. CS1 covers an urban population, has complicated boundaries and includes 5 unitary authorities. It gained ICS status in 2021. CS2 system shares near coterminosity with the county council, and system partners include social enterprises. It gained ICS status in one of the earliest waves. CS3 system has a large geographical footprint, and a complex, multi-layered governance structure spanning seven CCGs (merging to a single CCG in 2021) and eight Local Authorities. It became an ICS in 2020. The change in status from STP to ICS in CS1 and CS3 during the fieldwork did not impact our data collection as system members, leaders and the ongoing work of the system remained unaltered.

PA, MS, DO and CL agreed the theoretical framework, and the main themes derived from the research questions. MS, DO and CP agreed additional themes emerging from the data. The initial themes for our analysis included: partners' definition of the system and membership; the structure of governance arrangements; perceptions of developing accountabilities; developing spatial scales and functions; system resource allocation; relationships; drivers of co-operation; use of competition; devolution and space to act. The analysis of Phase 2 data drew on the same themes, with the addition of a theme concerned with the future development of system working. The interviews were transcribed, and coded (by MS, DO, OB, CL and CP) using the agreed coding framework. The principal researchers (MS, DO and CP) met periodically to check whether the coding framework was working well, to discuss emerging findings, and check researchers' interpretation of the data and areas of difference between the case studies and to agree to any necessary modifications to the coding framework.

## Patient and Public Involvement

1  
2  
3 No patients or public were involved in this study.  
4

## 5 **RESULTS**

6  
7 Our findings are grouped into three sections, each relating to a significant aspect of ICS  
8 decision-making. Firstly, the development of decision-making arrangements in ICSs, secondly  
9 how organisations are reconciling systems and individual roles, and thirdly the kind of  
10 decisions ICSs are making regarding the allocation of resources.  
11  
12  
13

### 14 **Development of decision-making arrangements**

15  
16 System partners were generally enthusiastic about the value of increased collaboration, seeing  
17 this as the best way to achieve better use of resources and health improvement across health  
18 and social care. The views of local authorities were mixed, viewing system development as  
19 both an opportunity and with a dose of scepticism. They were keen to be involved in  
20 arrangements as an equal partner, and not the *'last thing that you come to'* in a health focused  
21 system (Local Authority Director 4, CS3). Other non-NHS partners (social enterprises in CS2)  
22 also viewed ICSs with scepticism, for example the emphasis on achieving financial balance in  
23 the NHS was seen by some as illustrating the NHS-centric focus.  
24  
25  
26  
27  
28  
29  
30  
31

32 The refinement of governance arrangements was an ongoing task for local partners. Part of this  
33 task was agreeing the spatial configurations of systems and 'places'. We found that agreement  
34 between health and local government of the 'best' spatial configurations were of particular  
35 importance to ensuring clarity of governance arrangements. In two of our case studies (CS1  
36 and CS2) local partners appeared to be in agreement regarding the most sensible system and  
37 'place' configurations. In CS3 however, where the system spanned seven CCGs (merging to a  
38 single CCG in 2021) and eight Local Authorities, trying to reach consensus among partners  
39 about 'place' configuration was a lengthy process, making it difficult to progress integration, a  
40 process described as *'building the aeroplane while flying it at multiple levels'*. (NHS Trust  
41 Director, Borough-based partnership 1, CS3). In CS3, local government configurations were  
42 perceived to be a particularly awkward fit at the system level due to the sheer volume of  
43 organisations involved. Local actors deviated from the system/place division in favour of a  
44 'double-layer' set up, exemplified by the presence of an intermediate subsystem level which  
45 lay between the lower tier place partnerships (corresponding with local authority boundaries)  
46 and the ICS, described by one interviewee as *"systems within systems within systems"* (Local  
47 Authority Director 1, CS3). This arrangement was thought to reflect more accurately local  
48 configurations, but was also acknowledged, due in part to the lack of uniformity, to remain  
49  
50  
51  
52  
53  
54  
55  
56  
57  
58  
59  
60

1  
2  
3 complex, risking confusion and lack of clarity. In this case study, the role and membership of  
4 governance forums were differently understood and described, and the future shape of  
5 governance arrangements was contested.  
6  
7

8  
9 Beyond the local agreement of spatial configurations, system partners were finding agreeing  
10 local governance arrangements inherently challenging. This was seen to reflect both the scale  
11 of the system agenda and the already complex institutional landscape in which ICSs were  
12 situated:  
13  
14

15  
16  
17 *'Achieving clarity over where you make decisions, who makes decisions, and then who*  
18 *enacts them is really difficult, and you often only find out you've got it wrong by doing*  
19 *it...this is bottom up, and it's to take into account statutory body decision making, trying*  
20 *to make use of architecture that was already there, and then linking it all together. And*  
21 *every time we do it, we find other bits that we then add in, because it's just reflective of*  
22 *the size of the remit of an ICS' (ICS Director 1, CS2)*  
23  
24  
25  
26  
27

28 The drive to establish partnership working at the lowest possible level, in line with the principle  
29 of subsidiarity, was hampered by a lack of clarity both from national policy and locally on how  
30 to distribute power, resources and responsibilities between different levels of governance.  
31 Local actors in all three case studies found it challenging to decide which decisions and  
32 functions should sit where. In particular in CS3 the agreement of such arrangements were  
33 further hampered by the lack of consensus regarding the configuration of 'places', reflecting  
34 the existence of two non-aligned spatial configurations at 'place scale'. In all the case studies,  
35 going through these arrangements locally on a case-by-case basis was a time consuming and  
36 complex process, which was particularly difficult given the shifting sands of policy, the  
37 prioritisation of the COVID-19 response and, in some instances, the existence of power  
38 dynamics regarding who the decision makers were.  
39  
40  
41  
42  
43  
44  
45  
46  
47

48 Increasingly, formal governance arrangements were being developed which included an  
49 emerging focus on the prioritisation of 'place' collective voice over representation of individual  
50 organisations. All of our case studies were considering the adoption of a formal partnership  
51 arrangements in 'places', such as an Alliance agreement, although only one (CS2) had adopted  
52 a formal Alliance agreement. There was some frustration regarding the effort expended on the  
53 establishment and refinement of governance and the perceived added value of this activity. As  
54 the lead of a place-based partnership observed, informal relationships between partners were  
55 more important to the achievement of collaboration than formal governance arrangements:  
56  
57  
58  
59  
60

1  
2  
3 *'I think you can easily really get quite led astray on the governance. You can easily*  
4 *spend years and years doing the governance. But I think in reality it's very difficult in*  
5 *governance terms and in NHS contracting terms to force an organisation to do*  
6 *something they don't want to do, and actually in all my years, and I've got many years,*  
7 *actually, in reality I've hardly ever voted on a board, hardly ever had to have a count*  
8 *up of those, and I've hardly ever gone through any sort of legal proceedings on NHS*  
9 *contracts'* (Place Director, CS 2)  
10  
11  
12  
13  
14  
15

16 Others experienced governance architecture as significant. For example, smaller partners such  
17 as GPs, and those who were not often previously invited to the table, such as District Councils,  
18 welcomed the formal structures which allowed them an equal voice in discussions.  
19  
20  
21

### 22 **Reconciliation of system and individual responsibilities**

23  
24 The reconciliation of system and individual responsibilities was reported similarly across the  
25 three case studies. This reconciliation was aided by an ongoing shift from competition to  
26 collaborative working, and a changing environment regarding commissioning mechanisms,  
27 pricing structures and financial incentives. In the second phase of the research, the changing  
28 financial regime in response to COVID-19 was reported to have *'completely rewritten the*  
29 *rulebook'* (ICS Director 2, CS2), moving to block contract payments 'on account' for all NHS  
30 providers, with suspension of the Payment By Results (PBR) national tariff.<sup>3</sup> In all case studies,  
31 formal tendering or competitive processes were no longer anticipated to be a commonly used  
32 commissioning mechanism.  
33  
34  
35  
36  
37  
38  
39

40  
41 While incentives for competition among providers had subsided, organisations were still  
42 finding it challenging to balance system and individual responsibilities. Among NHS partners  
43 there was scepticism about the effectiveness of financial incentives to encourage NHS  
44 organisations to favour a system perspective. In the first phase of our research the notion of  
45 achieving financial balance within systems was widely viewed as unrealistic, unattainable, and  
46 unsupported by the wider regulatory context. More detailed objections were that individual  
47 control total allocations did not consider local circumstances and imposed stringent efficiency  
48 targets on already struggling and historically underfunded providers. Agreeing projections of  
49 performance against control totals was described as a process of negotiation with NHSEI. In  
50 the second phase, interviewees were concerned that while the Elective Recovery Fund  
51  
52  
53  
54  
55  
56  
57  
58

---

59 <sup>3</sup> PBR is a prospective payment system, associated with incentives for competition, in which each episode of  
60 care is charged at national tariff rates

1  
2  
3 (additional funding for clearing the elective backlog created by COVID-19) was encouraging  
4 organisations to make plans together, it was not a sufficient mechanism to stop individual  
5 organisations giving priority to their organisational interests and patients. One Acute Trust  
6 Director saw a clear tension between *'the glib [regional NHSE/I] vision that we've all suddenly*  
7 *switched to managing waiting lists as a sector'* and what they saw as the duty of NHS Trusts  
8 to prioritise their own patients:  
9

10  
11  
12  
13  
14 *'There's a huge variation in the scale and nature of the problem in the different*  
15 *organisations, and we at [hospital] hold most of the problem on elective recovery in*  
16 *terms of the long waits. And if everybody were to suddenly use all their capacity then,*  
17 *for the good of the system, some organisations wouldn't do any operating on their own*  
18 *patients for a very long time, they would spend a long time operating on our patients*  
19 *and not much else. And that's not really a proposition that you can put to the statutory*  
20 *body and expect it to accept that, so while we're making incremental steps in that*  
21 *direction, they know that's not feasible'.* (Director, Acute Trust, CS3)  
22  
23  
24  
25  
26  
27

28  
29 Provider concerns that system priorities could run counter to organisational interests were  
30 prevalent. On the one hand, some interviewees were quite sanguine about the prospect of  
31 dropping some of their organisational priorities in favour of shared priorities, if this led to an  
32 improvement of services in the locality. For example, an Acute Trust Director suggested that  
33 the Trust would be prepared to spend extra money on areas of need, such as housing, and other  
34 services rather than spending it on their own hospital. Others, however, reflected on the  
35 potential risks of collective decision making in the light of individual organisation's statutory  
36 responsibility to ensure that risks to the organisation and the public were mitigated effectively.  
37 One Acute Trust CEO summarised it thus:  
38  
39  
40  
41  
42  
43

44  
45 *'So then you get into a conversation, well, maybe there's horse trading to be done in*  
46 *the system, which is I expect what the centre thinks, they think, well, they will just have*  
47 *to agree across the system to cut their cloth if you like...X Hospital needs a new roof*  
48 *which is more important than my theatres because the rain gets in on the patients...I*  
49 *mean, if a woman in my organisation dies of some hideous infection after she's had her*  
50 *section, I wonder who's going to be in the coroner's court explaining why we let her be*  
51 *operated on in an operating theatre that I knew wasn't meeting the standard. It's really*  
52 *tricky, isn't it?'* (Director, Acute NHS FT, CS2)  
53  
54  
55  
56  
57  
58  
59  
60

1  
2  
3 A further perspective on balancing system and individual priorities was provided by local  
4 authority and the independent sector interviewees in CS2. From the local authority perspective,  
5 the wider institutional context was not conducive to system working due to differences in  
6 business and planning cycles between health and local government, the wider remit of local  
7 councils (of which social care was only a part) and differing approaches to procurement. Where  
8 system or 'place' boundaries were not aligned with local authority footprints such as in two-  
9 tier 'place' configuration in CS3, local authorities were more reluctant to engage in strategic  
10 commissioning and planning discussions. Local authority interviewees in all case studies were  
11 also concerned about their potential exposure to financial risk, and loss of control over limited  
12 council resources. Interviewees from the two social enterprises in CS2 suggested that balancing  
13 individual and system roles was very difficult for independent sector organisations, who had  
14 obligations to break even and sat outside the supportive policy context of the NHS.

15  
16  
17 System partners in all case studies acknowledged that, as system commissioning  
18 responsibilities evolved, conflicts of interest were inherent in this partnership mode of decision  
19 making, but believed that the benefits of collaborative decision making outweighed the risks  
20 of conflicting interests. In terms of overcoming conflicts of interest, it was thought that  
21 conventional methods of addressing conflicts, most commonly by removing the conflicted  
22 party from the decision-making process, were insufficient as everyone was an interested party  
23 with a potential conflict. It was hoped that the close collaborative environment and peer  
24 monitoring would guard against abuses of influence, and that the consensus model of decision  
25 making would allow objections to be voiced.

26  
27  
28 Accountability is a central concept when examining the potential of ICSs to achieve their goals,  
29 both vertical (and formal) accountability (holding to account of the system, system leaders and  
30 (NHS) system partners for system performance by NHSEI), but also informal and horizontal  
31 accountability (the holding to account of system partners by the system). ICSs also have an  
32 informal accountability relationship with the public which should be considered alongside  
33 system partners' own accountabilities to the public. Horizontal accountability between system  
34 partners was reported across our case studies to be weak, characterised by 'softer' mechanisms  
35 of holding to account through trust, rather than in a formal or codified way. This developing  
36 assurance function concerned open information exchange about organisational performance,  
37 quality and finance which could facilitate open discussion and serve as an incentive to improve.



An understanding of the needs of local patients and communities underlies the aims of systems, particularly those around population health and the development of local partnerships. The case study systems were developing routes to public engagement of various kinds and at varying spatial scales, seeking to understand the priorities, needs and preferences of the population. Each had established citizens' panels with varied aims, such as in CS1 to start a public debate about allocation of limited resources. Other routes to engagement included research to understand residents' opinions and activities in conjunction with Healthwatch. At the time of the fieldwork ICSs had no formal accountability to the public. Formal accountability was understood to lie with, and largely be performed through, the partners that held a legal duty to involve the public. It was acknowledged this meant the visibility to the public of the ongoing work of the collaborative partnerships and hence public accountability remained low.

### Decisions regarding resource allocation being made by systems

Our research was conducted during the early days of system working, and due to the disruption caused by the COVID-19 pandemic, it is difficult to assess the extent to which ICSs are achieving their aims concerning the allocation of resources more efficiently and financial balance within the system. We gathered multiple examples of work being carried out across systems and 'places' to share resources, change resource allocation and improve partnership working (see Table 3 below for examples of work at place scale). However local actors acknowledged that the impact of these initiatives in terms of efficiencies and quality markers is difficult to quantify.

Table 3: Examples of work being carried out at place scale

| Case Study | Examples of partnership working in 'places'                                                                                                                                                                                                                                                                                                                                                                                                                                                                                                                                                      |
|------------|--------------------------------------------------------------------------------------------------------------------------------------------------------------------------------------------------------------------------------------------------------------------------------------------------------------------------------------------------------------------------------------------------------------------------------------------------------------------------------------------------------------------------------------------------------------------------------------------------|
| CS1        | Development of data driven approach to care <ul style="list-style-type: none"> <li>• Establishment of population health unit across local authority and acute trust</li> <li>• Data sharing across primary and secondary care</li> </ul> Appointment of Health Aging Co-ordinators across social, primary and secondary care<br>Development of system-wide pathways, such as end of life care strategy                                                                                                                                                                                           |
| CS2        | Resolution of operational performance issues, including day to day capacity management<br>Work with wider partners to situate services outside hospital, including development of new premises<br>Development of key worker affordable housing on hospital site<br>Development of opportunities for shared service delivery, such as urgent treatment centre<br>Decisions regarding the distribution of non-recurrent funding<br>Development of 'integrated delivery units' such as discharge team with jointly funded lead<br>Pilot for 'step-down' nursing provision to aid hospital discharge |
| CS3        | At intermediate subsystem tier:<br><br>Sharing best practice across boroughs                                                                                                                                                                                                                                                                                                                                                                                                                                                                                                                     |

|  |                                                                                                                                                                                                                                                                                                                                                                                                                                               |
|--|-----------------------------------------------------------------------------------------------------------------------------------------------------------------------------------------------------------------------------------------------------------------------------------------------------------------------------------------------------------------------------------------------------------------------------------------------|
|  | Performance management and assurance<br>Resource allocation<br>Operational command for COVID-19<br><br>In borough-based partnerships:<br>Development of 'multi-disciplinary discharge hubs'<br>Pathway development for interface between hospital and wider system<br>Operational collaboration during COVID-19 response<br>Development of shared workforce strategy<br>Decisions regarding the distribution of, COVID-19 contingency funding |
|--|-----------------------------------------------------------------------------------------------------------------------------------------------------------------------------------------------------------------------------------------------------------------------------------------------------------------------------------------------------------------------------------------------------------------------------------------------|

At system scale agreements had been reached to share resources in order to take advantage of economies of scale, and offer mutual support. A common focus was sharing staff (both managerial and clinical) between providers with a view to helping to improve performance, sharing best practice and expertise, joint staff bank, a virtual academy. CS2 appeared most proactive in sharing resources at system and place level, and this had in part been enabled by considerable transformation monies associated with early ICS status which had been used to pilot changes to care design and delivery. In all case studies further sharing of resources was necessitated by the pandemic, where partners made collective decisions about allocating funds and risk-sharing in the course of the pandemic response. It was recognized, however, that the real test about sharing of resources would come in the future, when decisions about priorities would need to be taken in normal conditions rather than either in the middle of a pandemic or accompanied by significant additional funds.

As described in the section above, the financial regime changed greatly during the period of the research, moving towards the facilitation of collaborative behaviour. While these changes in payment mechanisms were seen as helpful facilitators, collaboration around the collective use of resources was not plain sailing. Other forms of competition between providers remained, for example competition for allocation of resources or competitive pressures in distribution of services, access to workforce, capital and investment.

Overall, the changing financial regime did not appear sufficient to allow systems to address long standing issues. While systems were engaged in negotiating actions to achieve long term financial sustainability, for example to spend more in primary/community services, increase digital interventions, reduce duplication of functions across organisations, and limit ineffective procedures, this had not yet translated into specific agreements in practice. In CS2, forthcoming work to decide functions to be shared across acute hospitals, and reduce face to face outpatient appointments, was expected to be a '*really difficult and painful*' process (ICS Director 3, CS2).

1  
2  
3 Some interviewees reported there was reticence addressing such difficult issues, such as the  
4 need to reconfigure services across sites to make savings, in ICS forums due to the decision-  
5 making model. The CS2 ICS Accountable Officer suggested organisations' statutory  
6 accountabilities were allowing a 'retreat' from the confrontation of difficult issues facing  
7 systems, such as agreeing action to achieve financial sustainability. Place-based partnerships,  
8 due to the informal nature of their working, were not seen as an appropriate forum for  
9 disagreement and difficult discussions. An Acute Trust Director in CS2 noted it was difficult  
10 to discuss performance issues in 'place', such as a reported lack of GP appointment availability  
11 causing an increase in demand for urgent care in hospital, particularly at a time when service  
12 providers were under a great deal of strain due to the response to COVID-19, and in light of  
13 voluntary nature of co-operation.  
14  
15  
16  
17  
18  
19  
20  
21  
22

## 23 **DISCUSSION AND CONCLUSION**

24 Our findings suggest that the shift to collaborative working has been largely welcomed. While  
25 this was particularly the case for NHS organisations, other system partners, specifically Local  
26 Authorities and non-NHS providers, welcomed the shift to collaboration, but were more critical  
27 of the vehicle of ICSs due to the perceived NHS centric focus of ICS policy.  
28  
29  
30  
31

32 Wider context, referring to the broader contextual variables in which collaboration takes place,  
33 can enable or inhibit collaboration (38). The institutional context in the NHS is reshaping to  
34 accommodate collaborative approaches: commissioning mechanisms, pricing structures and  
35 financial incentives are subject to change, along with regulatory approaches. While progress in  
36 achieving system aims had been hampered by the operational response to the COVID-19  
37 pandemic, local actors felt that collaboration in systems led to improvements in ways that did  
38 not occur previously and, in particular, cited many examples of changes to service delivery that  
39 had been achieved through place-based partnerships. However, our findings suggest there are  
40 challenges in making decisions through ICSs, particularly in relation to reaching agreement  
41 concerning complex and/or difficult matters. These challenges need to be recognised as  
42 statutory ICBs enact their allocative responsibilities, and the complexity and scale of ICS  
43 activities and decisions increases.  
44  
45  
46  
47  
48  
49  
50  
51  
52

53 This study, based in case studies of three ICSs, provides a detailed and nuanced analysis of the  
54 ongoing development of ICSs, and the effectiveness of this form of collaboration as a means  
55 to achieving ICS goals. This is particularly important and timely given the recent legislation  
56 changes of HCA 2022 from July 2022. The study has certain limitations. *Firstly*, Phase 1 of  
57  
58  
59  
60

1  
2  
3 the fieldwork (conducted between December 2019 and March 2020), was cut short due to the  
4 COVID-19 pandemic. We were not able to interview all partners in our case studies. In  
5 particular, we had fewer interviews in CS1 than intended. This restriction may have reduced  
6 nuance in the findings of this report. *Secondly*, as the study design consisted of three in depth  
7 case studies, it is not possible to make statistically based generalisations to the whole NHS.  
8 However, as the study is based on a strong theoretical framework, it is possible to make  
9 analytical generalisations. We have noted the extent to which findings from the three case  
10 studies themselves converged and diverged. *Thirdly*, given the disruption of the pandemic, it  
11 is very difficult at this time to evaluate the extent to which ICSs are going to be able to allocate  
12 resources more efficiently across sectoral boundaries and bring their local health economies  
13 into financial balance.

14  
15  
16  
17  
18  
19  
20  
21  
22  
23  
24 Our findings suggest there remain significant challenges regarding agreeing governance,  
25 accountability and decision making arrangements. which need to be addressed to facilitate  
26 successful collaboration, Factors identified by Ostrom as necessary building blocks for  
27 successful collaboration, such as agreeing clear boundaries and membership and agreeing how  
28 decisions should be made, were proving difficult to address in some systems. Earlier studies of  
29 systems (19, 24) found attention in developing STPs and ICSs was focused on ground work  
30 and preliminary activities, and it is notable that system governance arrangements are still  
31 subject to ongoing refinement. Our research suggests where complexity in the local context  
32 increases, particularly where there is a no 'natural fit' between the health and local government  
33 footprints, it can be very difficult for partners to agree governance arrangements. This is a  
34 particular risk in relation to partners outside the NHS, most pertinently local government,  
35 where there is weaker incentivisation in the first place to engage with system working. Where  
36 system and local council footprints aligned (as in CS2) statutory planning bodies involving  
37 local authorities, such as Health and Wellbeing Boards, could become incorporated into system  
38 architecture. CS3 was distinct as an illustration of the difficulties encountered where system  
39 and place spatial scales are not considered as coherent or meaningful groupings across health  
40 and local government. Our findings suggest that awkward boundaries can threaten local  
41 government 'buy-in' to strategic commissioning and planning discussions. Negotiation among  
42 multiple parties to achieve clarity about governance arrangements, drain resources and  
43 consume time. Furthermore, where governance arrangements are not considered coherent or  
44 meaningful this can limit engagement of partners.

1  
2  
3  
4  
5  
6  
7  
8  
9  
10  
11  
12  
13  
14  
15  
16  
17  
18  
19  
20  
21  
22  
23  
24  
25  
26  
27  
28  
29  
30  
31  
32  
33  
34  
35  
36  
37  
38  
39  
40  
41  
42  
43  
44  
45  
46  
47  
48  
49  
50  
51  
52  
53  
54  
55  
56  
57  
58  
59  
60

There is a balance to be struck between retaining flexibility at ICS level regarding governance arrangements, and having to follow national guidance. It has been noted that the ambition for local flexibility in HCA 2022 is encouraging as it is considered a key enabler of collaboration, and there are hopes this flexibility will be protected from *'the NHS's tendency to centralise, which could lead to an overly prescriptive system architecture – despite everyone's best intentions.'* (39) see also, (40). A key tenet of Ostrom's design principles is that, for collaboration to be successful, local parties need to be involved in the development of the rules of the game (30). The iterative development of governance arrangements among local parties is thought to be important in developing norms of trust and reciprocity between partners which underpin increased collaborative working, and encourage fairness and adherence to local rules (30). However, where a similar process is occurring in parallel ICS, it can also be argued that 'reinventing the wheel' should be minimised. There is a case for increased support for systems in their task of putting in place clear 'rules of the game', including additional specified 'scaffolding' shaping governance requirements such as committee membership and accountability arrangements, to avoid unnecessary local discussion where local areas are all engaged in similar tasks. This is particularly pertinent in light of the lack of specification in HCA 2022 and associated guidance regarding to governance arrangements in place-based partnerships or provider collaboratives where it is anticipated many ICB functions will be delegated. Local 'fatigue' regarding the ongoing refinement of governance arrangements should be acknowledged, together with the possibility that this fatigue may outweigh relational gains particularly where there are existing strong relationships.

Despite changes in the NHS institutional context to support adoption of 'best for system' perspective, the reconciliation of system and individual responsibilities is proving difficult in the light of organisational sovereignty and the lack of formal authority of system leaders. Ostrom suggests that for collaboration to succeed participants should feel the costs and benefits of collaboration are in balance. Our findings indicate that partners are not convinced that the separate statutory obligations of individual organisations would always be best served by taking decisions on a best-for-system perspective. This echoes findings of earlier studies of ICSs and their predecessors, STPs (24, 41). Indeed in their study of STPs, Waring et al., found that, far from putting interests aside, partners were engaged in 'micro-political' disagreements seeking to advance or protect their particular preferences, agendas or interests (41). Such disagreements indicate the challenges of addressing contentious issues in the light of organisational sovereignty without independent arbitration and hierarchical control.

1  
2  
3  
4  
5 Importantly, making ICSs statutory bodies does not overcome this problem, as partner  
6 organisations will retain their organisational sovereignty, and consequently the capacity to  
7 disagree with system proposed plans. There are a number of possible avenues to address this  
8 problem. One strategy is to develop strong horizontal accountabilities between system partners  
9 allowing them to develop the necessary sanctions to build trust and ensure adherence of agreed  
10 'rules of the game' (30). Our research indicates that such structures are currently  
11 underdeveloped, and it is unclear how well those new lines of accountabilities, especially the  
12 horizontal ones, will work in practice. A further potential strategy, as proposed by Waring et  
13 al., is, given the absence of formal authority in ICSs, to seek to improve system leaders'  
14 political skills, developing negotiation and deal-maker skills to identify means of off-setting  
15 perceived losses (41). It is also possible that the issue may be further addressed through  
16 changes in HCA 2022 which seek to change the policy context, incentivising the adoption of a  
17 'best for system' approach by introducing a 'duty of co-operate' for NHS bodies and a 'triple  
18 aim' duty to consider the effects of their decisions on the better health and wellbeing of  
19 everyone, the quality of care for all patients, and the sustainable use of NHS resources. Given  
20 the inherently voluntary, consensus driven nature of collaboration, it is likely that a  
21 combination of all the above approaches will be necessary to assist systems in making  
22 contentious decisions. It is also our contention that an arbiter independent of local system  
23 members may be still required to resolve disputes and it seems likely that the regional directors  
24 of NHSEI could undertake this role in practice.  
25  
26  
27  
28  
29  
30  
31  
32  
33  
34  
35  
36  
37  
38  
39  
40

41 Looking ahead, under HCA 2022 the collaborative approach will be applied to decisions  
42 regarding the allocation of resources. Our research raises a number of points in this regard.  
43 *Firstly*, the tensions in decision making in ICSs, particularly concerning addressing difficult  
44 issues, together with a lack of formal arrangements to deal with disagreements, could become  
45 significant fault lines as statutory ICBs enact their new commissioning responsibilities.  
46 *Secondly*, conflicts of interest in relation to commissioning decisions will be pervasive with no  
47 clear route for mitigation. Although interviewees felt negative consequences were outweighed  
48 by the benefits of collaborative decision making, arguably this issue goes to the heart of how  
49 ICBs will be able to operate in the interests of the local population as opposed to prioritising  
50 those of powerful organisations. It is not clear how, in the absence of a separate commissioning  
51 body whose sole role it is to achieve results without having undue regard to the effects on the  
52 finances of individual organisations, ICBs will be able to plan and commission services which  
53  
54  
55  
56  
57  
58  
59  
60

1  
2  
3 best meet the needs of local populations. It is not clear that using the ICS model consensus will  
4 always be achieved, nor that it will be the optimum consensus for population health.  
5  
6

7 In conclusion while the ICS model of collaboration has been embraced by local actors in the  
8 NHS and elsewhere, there remain significant challenges regarding agreeing governance,  
9 accountability and decision making arrangements. Viewing ICSs through a network  
10 governance or collaborative governance perspective such as that of Ostrom's work is a valuable  
11 approach to assess the development of collective action in the articular context of ICSs, and to  
12 identify measures which might be taken to strengthen arrangements. It is clearly important to  
13 continue to study the development of system working in the future to see how these issues are  
14 tackled as the effect of the pandemic diminishes and systems have longer experience of  
15 working together.  
16  
17  
18  
19  
20  
21  
22  
23  
24  
25

### 26 **Funding statement**

27 This research is funded by the National Institute for Health Research (NIHR) Policy Research  
28 Programme, conducted through the Policy Research Unit in Health and Social Care Systems  
29 and Commissioning, PR-PRU-1217-20801. The views expressed are those of the authors and  
30 not necessarily those of the NIHR or the Department of Health and Social Care.  
31  
32  
33  
34  
35

### 36 **Author Contributions**

37 All of the authors (MS, PA, DO, CP, OB and CL) met the criteria for authorship, and were  
38 involved in the design and data analysis of the study, and contributed to the drafting, revision  
39 and finalisation of this paper. In addition, OB, CL, DO, CP and MS collected the data for this  
40 study.  
41  
42  
43  
44  
45

### 46 **Competing interests**

47 All of the authors received grant funding from the Department of Health via its Policy Research  
48 Programme for this research. No authors have had financial relationships with any  
49 organisations that might have an interest in the submitted work in the previous three years, and  
50 no authors have any other relationships or activities that could appear to have influenced the  
51 submitted work.  
52  
53  
54  
55  
56

### 57 **Ethics approval**

1  
2  
3 NHS research governance approval from the HRA was granted on 6 August 2019 (266175/REC  
4 ref 19/HRA/3261). Ethical approval for the study was granted by the London School of  
5 Hygiene and Tropical Medicine internal ethics committee on 23 August 2019 (Ref:17711). The  
6  
7 research received endorsement from the Association of Directors of Adult Social Services  
8  
9 Executive Council on 19 November 2019.  
10  
11  
12

### 13 **Data sharing statement**

14 No additional data are available  
15  
16  
17  
18  
19  
20  
21  
22  
23  
24  
25  
26  
27  
28  
29  
30  
31  
32  
33  
34  
35  
36  
37  
38  
39  
40  
41  
42  
43  
44  
45  
46  
47  
48  
49  
50  
51  
52  
53  
54  
55  
56  
57  
58  
59  
60

For peer review only



## References

1. NHS England, NHS Improvement. 2021/22 priorities and operational planning guidance. 2021.
2. Ham C. Competition and Integration in the English NHS. *BMJ*. 2008(336):805-7.
3. Bennett C, Ferlie E. Contracting in Theory and in Practice: some evidence from the NHS. *Public Administration*. 1996;74(Spring):49-66.
4. Allen P. A socio-legal and economic analysis of contracting in the NHS internal market using a case study of contracting for district nursing. *Social Science & Medicine*. 2002;54:255-66.
5. Frosini F, Dixon A, Robertson R. Competition in the NHS: a provider perspective. *Journal of Health Services Research and Policy*. 2012;17:16-22.
6. Porter A, Mays N, Shaw S, Rosen R, Smith J. Commissioning healthcare for people with long term conditions: the persistence of relational contracting in England's NHS quasi-market. *BMC Health Services Research*. 2013;13 (Suppl 1)(S2).
7. Department of Health and Social Care. Integration and Innovation: working together to improve health and social care for all. 2021.
8. NHS England. Five Year Forward View. London: NHS England, 2014.
9. Billings J, Mikelyte R, Coleman A, MacInnes J, Allen P, Croke S, et al. Supporting integrated care in practice: Perceptions of a national support programme for the development of New Care Models in England. *Journal of Integrated Care*. 2020;28:27-40.
10. NHS England. New Care Models: Vanguards - developing a blueprint for the future of NHS and care services. 2016.
11. Erens B, Wistow G, Mounier-Jacq S, Douglas N, Jones L, Mannacorda T, et al. Early evaluation of the Integrated Care and Support Pioneers Programme. Final report. London: Policy Innovation Research Unit (PIRU), 2016.
12. NHS England, NHS Improvement, Care Quality Commission, Health Education England, National Institute of Health and Care Excellence, England. PH. Delivering the Forward View: NHS planning guidance. London: 2015.
13. NHS England. The Long Term Plan. 2019.
14. Hammond J, Lorne C, Coleman A, Allen P, Mays N, Dam R, et al. The spatial politics of place and health policy: Exploring Sustainability and Transformation Plans in English NHS. *Social Science & Medicine*. 2017;190:217-26.
15. NHS England and NHS Improvement. NHS System Oversight Framework 2021/22. 2021.
16. NHS England and NHS Improvement. NHS Operational Planning and Contracting Guidance 2019/20. 2019.
17. DHSC. Integration and Innovation: working together to improve health and social care for all. 2021.
18. NHS England and NHS Improvement. ICS Design Framework. 2021.
19. Charles A, Wenzel L, Kershaw M, Ham C, Walsh N. A year of integrated care systems. London: The King's Fund, 2018.
20. Pett W. Accelerating transformation: How systems are funding and resourcing 'engine room' staff. London: NHs Confederation, 2019.
21. Pett W. STPs: One year to go? London: NHS Confederation, 2020.
22. Timmins N. Leading for Integrated Care. London: The King's Fund, 2019.
23. Lorne C, McDonald R, Walshe K, Coleman A. Regional assemblage and the spatial reorganisation of health and care: the case of devolution in Greater Manchester, England. *Sociology of Health & Illness*. 2019;41(7):1236-50.
24. Walshe K, Lorne C, Coleman A, McDonald R, Turner A. Devolving health and social care: Learning from Greater Manchester. Manchester: The University of Manchester, 2018.
25. Moran V, Allen P, Sanderson M, McDermott I, Osipovic D. Challenges of maintaining accountability in networks of health and care organisations: A study of developing Sustainability and

- 1  
2  
3 Transformation Partnerships in the English National Health Service. *Social Science & Medicine*.  
4 2020;268.
- 5 26. NHS Providers and NHS Clinical Commissioners. Driving forward system working: a snapshot  
6 of early progress in collaborative commissioning. London: NHS Confederation and the Foundation  
7 Trust Network., 2018.
- 8 27. Ansell C, Gash A. Collaborative Governance in Theory and Practice. *Journal of Public*  
9 *Administration Research and Theory*. 2008;18(4):543-71.
- 10 28. Jones L, Armit K, Haynes A, Lees P. Role of medical leaders in integrated care systems: what  
11 can be learnt from previous research. *BMJ Leader*. 2022.
- 12 29. Ostrom E. *Governing the commons, The evolution of institutions for collective action*.  
13 Cambridge: Cambridge University Press; 1990.
- 14 30. Ostrom E. *Neither market nor state: governance of common-pool resources in the twenty-*  
15 *first century*. 1994.
- 16 31. Smith-Nonini S, Bell B. Operationalizing a right to health: theorizing a National Health System  
17 as a 'Commons'. In: Singer M, Erickson P, editors. *A Companion to Medical Anthropology*. London:  
18 Blackwell Publishing Ltd; 2011.
- 19 32. Palumbo R. Contextualizing co-production of health care: a systematic literature review.  
20 *International Journal of Public Sector Management*. 2016;29(1):72-90.
- 21 33. Sanderson M, Allen P, Moran V, McDermott I, Osipovic D. Agreeing the allocation of scarce  
22 resources in the English NHS: Ostrom, common pool resources and the role of the state. *Social*  
23 *Science & Medicine*. 2020:112888.
- 24 34. Ham C, Alderwick H. *Place-based systems of care. A way forward for the NHS in England*.  
25 London: The King's Fund, 2015.
- 26 35. Robert G, Williams O, Lindenfalk B, Mendel P, Davis L, M., Turner S, et al. Applying Elinor  
27 Ostrom's Design Principles to Guide Co-Design in Health(care) Improvement: A Case Study with  
28 Citizens Returning to the Community from Jail in Los Angeles County. *International Journal of*  
29 *Integrated Care*. 2021;21(1)(7):1-15.
- 30 36. Sanderson M, Allen P, Osipovic D, Petsoulas C, Lau Y, Boiko O, et al. *The Developing*  
31 *Architecture of System Management: Integrated Care Systems and Sustainability and*  
32 *Transformation Partnerships*. PRUComm, 2022.
- 33 37. Lorne C, Allen P, Checkland K, Osipovic D, Sanderson M, Hammond J, et al. *Integrated Care*  
34 *Systems: What can current reforms learn from past research on regional co-ordination of health and*  
35 *care in England? A literature review*. PRUComm, 2019.
- 36 38. Ostrom E. *Understanding Institutional Diversity*. Princeton and Oxford: Princeton University  
37 Press; 2005.
- 38 39. Deakin M. 'Does the buck stop with integrated care systems?'. *Health Service Journal* 2021.
- 39 40. Alderwick H, Gardner T, Mays N. England's new health and care bill. The health secretary  
40 gains sweeping new powers, with unclear consequences for patients. *BMJ* 2021;374:n1767.
- 41 41. Waring J, Bishop S, Black G, Clarke J, Exworthy M, Fulop N, et al. Navigating the micro-  
42 politics of major system change: The implementation of Sustainability Transformation Partnerships  
43 in the English health and care system. *Journal of Health Services Research & Policy*. 2022.
- 44  
45  
46  
47  
48  
49  
50  
51  
52  
53  
54  
55  
56  
57  
58  
59  
60

## Standards for Reporting Qualitative Research (SRQR)

| No.                       | Topic                                                                                        | Item                                                                                                                                                                                                                                                                                                                                             |
|---------------------------|----------------------------------------------------------------------------------------------|--------------------------------------------------------------------------------------------------------------------------------------------------------------------------------------------------------------------------------------------------------------------------------------------------------------------------------------------------|
| <b>Title and abstract</b> |                                                                                              |                                                                                                                                                                                                                                                                                                                                                  |
| S1                        | Title                                                                                        | Concise description of the nature and topic of the study identifying the study as qualitative or indicating the approach (e.g., ethnography, grounded theory) or data collection methods (e.g., interview, focus group) is recommended                                                                                                           |
| S2                        | Abstract                                                                                     | Summary of key elements of the study using the abstract format of the intended publication; typically includes background, purpose, methods, results, and conclusions                                                                                                                                                                            |
| <b>Introduction</b>       |                                                                                              |                                                                                                                                                                                                                                                                                                                                                  |
| S3                        | Problem formulation                                                                          | Description and significance of the problem/phenomenon studied; review of relevant theory and empirical work; problem statement                                                                                                                                                                                                                  |
| S4                        | Purpose or research question                                                                 | Purpose of the study and specific objectives or questions                                                                                                                                                                                                                                                                                        |
| <b>Methods</b>            |                                                                                              |                                                                                                                                                                                                                                                                                                                                                  |
| S5                        | Qualitative approach and research paradigm                                                   | Qualitative approach (e.g., ethnography, grounded theory, case study, phenomenology, narrative research) and guiding theory if appropriate; identifying the research paradigm (e.g., postpositivist, constructivist/interpretivist) is also recommended; rationale <sup>b</sup>                                                                  |
| S6                        | Researcher characteristics and reflexivity                                                   | Researchers' characteristics that may influence the research, including personal attributes, qualifications/experience, relationship with participants, assumptions, and/or presuppositions; potential or actual interaction between researchers' characteristics and the research questions, approach, methods, results, and/or transferability |
| S7                        | Context                                                                                      | Setting/site and salient contextual factors; rationale <sup>b</sup>                                                                                                                                                                                                                                                                              |
| S8                        | Sampling strategy                                                                            | How and why research participants, documents, or events were selected; criteria for deciding when no further sampling was necessary (e.g., sampling saturation); rationale <sup>b</sup>                                                                                                                                                          |
| S9                        | Ethical issues pertaining to human subjects                                                  | Documentation of approval by an appropriate ethics review board and participant consent, or explanation for lack thereof, other confidentiality and data security issues                                                                                                                                                                         |
| S10                       | Data collection methods                                                                      | Types of data collected; details of data collection procedures including (as appropriate) start and stop dates of data collection and analysis, iterative process, triangulation of sources/methods, and modification of procedures in response to evolving study findings; rationale <sup>b</sup>                                               |
| S11                       | Data collection instruments and technologies                                                 | Description of instruments (e.g., interview guides, questionnaires) and devices (e.g., audio recorders) used for data collection; if/how the instrument(s) changed over the course of the study                                                                                                                                                  |
| S12                       | Units of study                                                                               | Number and relevant characteristics of participants, documents, or events included in the study; level of participation (could be reported in results)                                                                                                                                                                                           |
| S13                       | Data processing                                                                              | Methods for processing data prior to and during analysis, including transcription, data entry, data management and security, verification of data integrity, data coding, and anonymization/deidentification of excerpts                                                                                                                         |
| S14                       | Data analysis                                                                                | Process by which inferences, themes, etc., were identified and developed, including the researchers involved in data analysis; usually references a specific paradigm or approach; rationale <sup>b</sup>                                                                                                                                        |
| S15                       | Techniques to enhance trustworthiness                                                        | Techniques to enhance trustworthiness and credibility of data analysis (e.g., member checking, audit trail, triangulation); rationale <sup>b</sup>                                                                                                                                                                                               |
| <b>Results/findings</b>   |                                                                                              |                                                                                                                                                                                                                                                                                                                                                  |
| S16                       | Synthesis and interpretation                                                                 | Main findings (e.g., interpretations, inferences, and themes); might include development of a theory or model, or integration with prior research or theory                                                                                                                                                                                      |
| S17                       | Links to empirical data                                                                      | Evidence (e.g., quotes, field notes, text excerpts, photographs) to substantiate analytic findings                                                                                                                                                                                                                                               |
| <b>Discussion</b>         |                                                                                              |                                                                                                                                                                                                                                                                                                                                                  |
| S18                       | Integration with prior work, implications, transferability, and contribution(s) to the field | Short summary of main findings; explanation of how findings and conclusions connect to, support, elaborate on, or challenge conclusions of earlier scholarship; discussion of scope of application/generalizability; identification of unique contribution(s) to scholarship in a discipline or field                                            |
| S19                       | Limitations                                                                                  | Trustworthiness and limitations of findings                                                                                                                                                                                                                                                                                                      |
| <b>Other</b>              |                                                                                              |                                                                                                                                                                                                                                                                                                                                                  |
| S20                       | Conflicts of interest                                                                        | Potential sources of influence or perceived influence on study conduct and conclusions; how these were managed                                                                                                                                                                                                                                   |
| S21                       | Funding                                                                                      | Sources of funding and other support; role of funders in data collection, interpretation, and reporting                                                                                                                                                                                                                                          |

<sup>a</sup>The authors created the SRQR by searching the literature to identify guidelines, reporting standards, and critical appraisal criteria for qualitative research; reviewing the reference lists of retrieved sources; and contacting experts to gain feedback. The SRQR aims to improve the transparency of all aspects of qualitative research by providing clear standards for reporting qualitative research.  
<sup>b</sup>The rationale should briefly discuss the justification for choosing that theory, approach, method, or technique rather than other options available, the assumptions and limitations implicit in those choices, and how those choices influence study conclusions and transferability. As appropriate, the rationale for several items might be discussed together.

51. Title identifies study as qualitative (title page)

52. Abstract adheres to BMJ Open guidelines (Abstract)

53/54. Introduction adheres to guidance (p4-8)

55. Qualitative approach is described (p9-10. Guiding theory (p6-7)

56. Researcher characteristics that would influence the research were not identified.

57. Case studies briefly described (p10)

58. Selection criteria described (p9).

59. Ethics approval detailed (p20)

510. Data collection methods described (p9-10)

511. Interview topics described (p10)

512. Number of participants and characteristics described (Table 1 and 2)

513. Analysis described (p10)

514. Process of analysis described (p10)

515. Process described in methods (p10-11)

516/517. Findings are linked to prior research (p18). Quotes throughout findings (p11-17)

518/519 Discussion summarises findings and links to earlier scholarship.

(p18) Scope of application discussed and limitations (p17-18)

520/521 Conflicts of interest and funding acknowledged (p20)
